# Supplementary material for: Transcriptome Profiling Provides Insights Into Potential Antagonistic Mechanisms Involved in Chaetomium globosum Against Bipolaris sorokiniana
Source: Front Microbiol. 2020 Dec 7;11:578115. doi: 10.3389/fmicb.2020.578115 (PMC7750538; doi:10.3389/fmicb.2020.578115)
Supplement: Supplementary Table 9 — List of KEGG pathways with associated genes in Cg2-BS112 interaction. [file Table_9.XLSX]

## Sheet: Pathway_and_genes
Supplementary Table S9 KEGG pathways analysis
KEGG pathways	Number of associated genes
2-Oxocarboxylic acid metabolism	TRINITY_DN7052_c0_g1_i6;TRINITY_DN8038_c4_g2_i5;TRINITY_DN8034_c2_g7_i1;TRINITY_DN7748_c0_g3_i1;TRINITY_DN7556_c4_g2_i4;TRINITY_DN8038_c4_g3_i2;TRINITY_DN7748_c0_g2_i1;TRINITY_DN7741_c6_g2_i4;TRINITY_DN7754_c6_g6_i2;TRINITY_DN6462_c0_g1_i6;TRINITY_DN7754_c6_g13_i1;TRINITY_DN7835_c1_g2_i1;TRINITY_DN8034_c2_g6_i2;TRINITY_DN7835_c1_g1_i3;TRINITY_DN7556_c4_g1_i2;TRINITY_DN7691_c0_g1_i1;TRINITY_DN7754…
ABC transporters	TRINITY_DN7985_c2_g2_i10;TRINITY_DN5213_c0_g1_i4;TRINITY_DN7604_c0_g2_i2;TRINITY_DN6175_c0_g1_i2;TRINITY_DN7604_c0_g5_i1;TRINITY_DN7343_c3_g6_i1;TRINITY_DN7604_c0_g7_i1;TRINITY_DN7985_c2_g6_i1;TRINITY_DN7983_c1_g5_i1;TRINITY_DN7778_c0_g1_i1;TRINITY_DN5266_c0_g2_i1;TRINITY_DN7983_c1_g1_i1;
Aflatoxin biosynthesis	TRINITY_DN7534_c3_g7_i1;TRINITY_DN12640_c0_g1_i1;TRINITY_DN16764_c0_g1_i1;
Alanine, aspartate and glutamate metabolism	TRINITY_DN7980_c1_g7_i8;TRINITY_DN7914_c0_g17_i1;TRINITY_DN8023_c1_g1_i11;TRINITY_DN7963_c4_g1_i1;TRINITY_DN7729_c0_g11_i2;TRINITY_DN7980_c1_g5_i4;TRINITY_DN7173_c0_g2_i1;TRINITY_DN7556_c4_g5_i1;TRINITY_DN8023_c1_g5_i2;TRINITY_DN7620_c2_g1_i2;TRINITY_DN7963_c4_g2_i1;TRINITY_DN8101_c4_g1_i4;TRINITY_DN7910_c3_g1_i5;TRINITY_DN7910_c3_g2_i11;TRINITY_DN7551_c2_g4_i5;TRINITY_DN7949_c0_g3_i3;TRINITY_DN7…
alpha-Linolenic acid metabolism	TRINITY_DN7424_c4_g4_i1;TRINITY_DN7424_c4_g2_i1;TRINITY_DN16091_c0_g1_i1;TRINITY_DN7531_c0_g4_i1;TRINITY_DN7333_c3_g3_i3;TRINITY_DN7333_c3_g5_i1;TRINITY_DN7333_c3_g7_i1;TRINITY_DN1518_c0_g1_i1;
Aminoacyl-tRNA biosynthesis	TRINITY_DN7523_c3_g1_i5;TRINITY_DN7598_c1_g1_i5;TRINITY_DN7759_c0_g1_i1;TRINITY_DN7258_c1_g1_i7;TRINITY_DN8087_c0_g6_i1;TRINITY_DN7272_c0_g2_i3;TRINITY_DN7264_c0_g2_i2;TRINITY_DN6059_c0_g1_i1;TRINITY_DN6595_c1_g2_i1;TRINITY_DN6232_c0_g2_i2;TRINITY_DN7272_c0_g1_i2;TRINITY_DN7325_c0_g2_i2;TRINITY_DN8092_c1_g1_i1;TRINITY_DN7759_c0_g4_i2;TRINITY_DN6059_c0_g2_i1;TRINITY_DN7449_c3_g2_i1;TRINITY_DN7638_…
Aminobenzoate degradation	TRINITY_DN6939_c0_g2_i3;TRINITY_DN6939_c0_g1_i1;TRINITY_DN7809_c3_g2_i7;TRINITY_DN6985_c0_g1_i4;TRINITY_DN7590_c4_g7_i1;TRINITY_DN7809_c3_g4_i1;TRINITY_DN6144_c0_g1_i4;TRINITY_DN7310_c0_g2_i2;TRINITY_DN6603_c0_g1_i5;TRINITY_DN5960_c0_g1_i2;TRINITY_DN7627_c2_g1_i4;TRINITY_DN305_c0_g1_i2;
Amino sugar and nucleotide sugar metabolism	TRINITY_DN8107_c2_g2_i12;TRINITY_DN7862_c1_g8_i2;TRINITY_DN8015_c2_g12_i1;TRINITY_DN7917_c3_g3_i1;TRINITY_DN7433_c0_g3_i1;TRINITY_DN7917_c3_g5_i3;TRINITY_DN7798_c7_g2_i5;TRINITY_DN7624_c1_g2_i5;TRINITY_DN7502_c2_g4_i2;TRINITY_DN7862_c1_g1_i1;TRINITY_DN7687_c1_g1_i4;TRINITY_DN7624_c1_g5_i2;TRINITY_DN6976_c0_g2_i2;TRINITY_DN7285_c2_g1_i2;TRINITY_DN7918_c3_g4_i1;TRINITY_DN7285_c3_g2_i1;TRINITY_DN750…
AMPK signaling pathway	TRINITY_DN7304_c7_g5_i1;TRINITY_DN7619_c3_g2_i4;TRINITY_DN7304_c7_g6_i1;TRINITY_DN7534_c3_g7_i1;TRINITY_DN7321_c4_g3_i2;TRINITY_DN7861_c0_g2_i1;TRINITY_DN7970_c2_g4_i1;TRINITY_DN7970_c2_g1_i2;TRINITY_DN7540_c1_g1_i1;TRINITY_DN7812_c3_g6_i1;TRINITY_DN7972_c3_g2_i5;TRINITY_DN1963_c0_g1_i1;TRINITY_DN6905_c0_g2_i1;TRINITY_DN7972_c3_g1_i1;TRINITY_DN6905_c0_g1_i1;TRINITY_DN2126_c0_g1_i1;TRINITY_DN7454_…
Apoptosis	TRINITY_DN7924_c3_g6_i2;TRINITY_DN7003_c0_g1_i4;TRINITY_DN8015_c1_g3_i1;TRINITY_DN7571_c6_g1_i4;TRINITY_DN7976_c2_g1_i2;TRINITY_DN8015_c1_g2_i1;TRINITY_DN2126_c0_g1_i1;TRINITY_DN7976_c3_g3_i1;TRINITY_DN7571_c6_g2_i2;TRINITY_DN7924_c3_g10_i1;TRINITY_DN7976_c2_g2_i2;TRINITY_DN7976_c3_g2_i4;TRINITY_DN7472_c3_g1_i1;TRINITY_DN56721_c1_g2_i5;TRINITY_DN56721_c0_g1_i2;TRINITY_DN56599_c0_g1_i1;TRINITY_DN5…
Arachidonic acid metabolism	TRINITY_DN7424_c4_g4_i1;TRINITY_DN7424_c4_g2_i1;TRINITY_DN6609_c0_g1_i1;TRINITY_DN16091_c0_g1_i1;TRINITY_DN7531_c0_g4_i1;TRINITY_DN7599_c3_g6_i1;TRINITY_DN7599_c3_g7_i1;
Arginine and proline metabolism	TRINITY_DN7376_c1_g2_i2;TRINITY_DN7924_c3_g1_i2;TRINITY_DN7740_c1_g4_i2;TRINITY_DN7376_c1_g3_i2;TRINITY_DN7556_c4_g5_i1;TRINITY_DN7834_c1_g2_i1;TRINITY_DN6989_c0_g1_i1;TRINITY_DN7257_c5_g8_i3;TRINITY_DN6169_c0_g2_i2;TRINITY_DN6144_c0_g1_i4;TRINITY_DN7947_c0_g1_i3;TRINITY_DN5194_c0_g2_i1;TRINITY_DN7965_c2_g4_i2;TRINITY_DN4999_c0_g1_i2;TRINITY_DN7924_c3_g11_i1;TRINITY_DN7358_c3_g1_i3;TRINITY_DN7740…
Arginine biosynthesis	TRINITY_DN8023_c1_g1_i11;TRINITY_DN7924_c3_g1_i2;TRINITY_DN8023_c1_g5_i2;TRINITY_DN8101_c4_g1_i4;TRINITY_DN6462_c0_g1_i6;TRINITY_DN7117_c1_g2_i1;TRINITY_DN7949_c0_g3_i3;TRINITY_DN6957_c0_g2_i1;TRINITY_DN6957_c0_g1_i2;TRINITY_DN7924_c3_g11_i1;TRINITY_DN3708_c0_g1_i1;TRINITY_DN7949_c0_g1_i4;TRINITY_DN7732_c4_g1_i2;TRINITY_DN7390_c2_g3_i2;TRINITY_DN7390_c2_g5_i1;TRINITY_DN1645_c0_g1_i2;TRINITY_DN754…
Ascorbate and aldarate metabolism	TRINITY_DN6972_c0_g1_i9;TRINITY_DN7285_c3_g2_i1;TRINITY_DN7257_c5_g8_i3;TRINITY_DN7484_c7_g7_i1;TRINITY_DN5135_c0_g2_i1;TRINITY_DN7282_c8_g2_i1;TRINITY_DN7605_c4_g5_i1;TRINITY_DN7257_c5_g2_i1;
Atrazine degradation	TRINITY_DN7868_c2_g2_i1;TRINITY_DN7117_c1_g2_i1;
Autophagy - yeast	TRINITY_DN7965_c1_g1_i1;TRINITY_DN7304_c7_g5_i1;TRINITY_DN7723_c0_g1_i1;TRINITY_DN7965_c1_g2_i1;TRINITY_DN7734_c4_g1_i1;TRINITY_DN7304_c7_g6_i1;TRINITY_DN7767_c6_g1_i3;TRINITY_DN8073_c1_g4_i2;TRINITY_DN7970_c2_g4_i1;TRINITY_DN7970_c2_g1_i2;TRINITY_DN8075_c2_g7_i3;TRINITY_DN7568_c2_g2_i1;TRINITY_DN7718_c2_g4_i2;TRINITY_DN7559_c6_g1_i2;TRINITY_DN6195_c0_g2_i1;TRINITY_DN6434_c0_g1_i1;TRINITY_DN7995_…
Basal transcription factors	TRINITY_DN7678_c2_g3_i1;TRINITY_DN7442_c0_g2_i1;TRINITY_DN8074_c3_g8_i1;TRINITY_DN8074_c3_g3_i14;TRINITY_DN7560_c4_g11_i3;TRINITY_DN8010_c2_g7_i1;TRINITY_DN8010_c2_g8_i2;TRINITY_DN6471_c0_g1_i1;TRINITY_DN5907_c0_g2_i2;TRINITY_DN7653_c5_g1_i3;TRINITY_DN7687_c2_g10_i1;TRINITY_DN7628_c3_g2_i1;TRINITY_DN7442_c0_g3_i1;TRINITY_DN6222_c0_g1_i3;TRINITY_DN7888_c1_g2_i1;TRINITY_DN5907_c0_g1_i1;TRINITY_DN62…
Base excision repair	TRINITY_DN7398_c0_g3_i1;TRINITY_DN7953_c2_g5_i1;TRINITY_DN7924_c3_g6_i2;TRINITY_DN7504_c8_g1_i1;TRINITY_DN5105_c0_g1_i1;TRINITY_DN9201_c0_g1_i1;TRINITY_DN7837_c0_g10_i1;TRINITY_DN7837_c0_g7_i1;TRINITY_DN8034_c2_g1_i1;TRINITY_DN7511_c2_g1_i1;TRINITY_DN7504_c8_g2_i1;TRINITY_DN6502_c0_g1_i3;TRINITY_DN7990_c2_g1_i4;TRINITY_DN5352_c0_g1_i1;TRINITY_DN7970_c2_g8_i1;TRINITY_DN7924_c3_g10_i1;TRINITY_DN694…
Benzoate degradation	TRINITY_DN7590_c4_g7_i1;TRINITY_DN7450_c1_g2_i3;TRINITY_DN7815_c0_g1_i1;TRINITY_DN7815_c0_g2_i2;TRINITY_DN8030_c4_g2_i4;TRINITY_DN7873_c4_g6_i1;TRINITY_DN7873_c4_g8_i1;TRINITY_DN5096_c0_g2_i1;TRINITY_DN5096_c0_g1_i1;
beta-Alanine metabolism	TRINITY_DN7362_c0_g8_i1;TRINITY_DN7590_c3_g2_i3;TRINITY_DN7809_c3_g2_i7;TRINITY_DN8039_c5_g1_i1;TRINITY_DN7729_c0_g11_i2;TRINITY_DN7327_c1_g14_i1;TRINITY_DN7809_c3_g4_i1;TRINITY_DN7620_c2_g1_i2;TRINITY_DN7590_c3_g1_i2;TRINITY_DN7257_c5_g8_i3;TRINITY_DN7551_c2_g4_i5;TRINITY_DN7362_c0_g1_i3;TRINITY_DN7947_c0_g1_i3;TRINITY_DN8039_c5_g2_i3;TRINITY_DN7626_c2_g1_i1;TRINITY_DN7327_c1_g13_i1;TRINITY_DN66…
Biosynthesis of amino acids	TRINITY_DN7877_c1_g2_i6;TRINITY_DN7376_c1_g2_i2;TRINITY_DN7052_c0_g1_i6;TRINITY_DN7891_c1_g2_i1;TRINITY_DN7795_c0_g1_i2;TRINITY_DN8055_c0_g11_i3;TRINITY_DN5604_c0_g2_i1;TRINITY_DN7924_c3_g1_i2;TRINITY_DN7934_c2_g5_i2;TRINITY_DN7387_c1_g5_i2;TRINITY_DN7532_c0_g3_i2;TRINITY_DN8038_c4_g2_i5;TRINITY_DN7636_c1_g2_i1;TRINITY_DN7376_c1_g3_i2;TRINITY_DN7218_c0_g4_i6;TRINITY_DN7877_c1_g5_i3;TRINITY_DN8034…
Biosynthesis of antibiotics	TRINITY_DN8107_c2_g2_i12;TRINITY_DN7720_c1_g1_i2;TRINITY_DN7885_c3_g4_i3;TRINITY_DN7376_c1_g2_i2;TRINITY_DN7534_c3_g7_i1;TRINITY_DN7052_c0_g1_i6;TRINITY_DN7862_c1_g8_i2;TRINITY_DN7795_c0_g1_i2;TRINITY_DN8055_c0_g11_i3;TRINITY_DN5604_c0_g2_i1;TRINITY_DN7924_c3_g1_i2;TRINITY_DN7845_c2_g11_i1;TRINITY_DN7934_c2_g5_i2;TRINITY_DN6839_c0_g1_i9;TRINITY_DN7809_c3_g2_i7;TRINITY_DN7601_c0_g1_i3;TRINITY_DN78…
Biosynthesis of secondary metabolites	TRINITY_DN8107_c2_g2_i12;TRINITY_DN7146_c0_g3_i2;TRINITY_DN7362_c0_g8_i1;TRINITY_DN7885_c3_g4_i3;TRINITY_DN7668_c3_g1_i4;TRINITY_DN7877_c1_g2_i6;TRINITY_DN7471_c1_g2_i7;TRINITY_DN8096_c1_g1_i13;TRINITY_DN7376_c1_g2_i2;TRINITY_DN7534_c3_g7_i1;TRINITY_DN7961_c3_g1_i9;TRINITY_DN8031_c1_g6_i5;TRINITY_DN7707_c2_g4_i1;TRINITY_DN7052_c0_g1_i6;TRINITY_DN7571_c4_g1_i3;TRINITY_DN7701_c1_g3_i3;TRINITY_DN789…
Biosynthesis of unsaturated fatty acids	TRINITY_DN7238_c0_g2_i2;TRINITY_DN8052_c4_g2_i4;TRINITY_DN8052_c4_g1_i1;TRINITY_DN7211_c3_g14_i2;TRINITY_DN6915_c0_g1_i1;TRINITY_DN7721_c5_g1_i5;TRINITY_DN6915_c0_g4_i1;TRINITY_DN7333_c3_g3_i3;TRINITY_DN7721_c5_g6_i2;TRINITY_DN7211_c3_g13_i1;TRINITY_DN7238_c0_g1_i1;TRINITY_DN7333_c3_g5_i1;TRINITY_DN7333_c3_g7_i1;TRINITY_DN1518_c0_g1_i1;TRINITY_DN6695_c0_g1_i1;TRINITY_DN6695_c0_g2_i1;
Biotin metabolism	TRINITY_DN6429_c0_g1_i3;TRINITY_DN6202_c0_g1_i1;TRINITY_DN3528_c0_g1_i1;TRINITY_DN7924_c3_g2_i1;TRINITY_DN4760_c0_g1_i2;TRINITY_DN5987_c0_g1_i1;TRINITY_DN992_c0_g1_i1;TRINITY_DN4588_c0_g1_i2;TRINITY_DN2878_c0_g1_i2;TRINITY_DN213_c0_g1_i1;
Butanoate metabolism	TRINITY_DN7980_c1_g7_i8;TRINITY_DN7809_c3_g2_i7;TRINITY_DN7729_c0_g11_i2;TRINITY_DN7980_c1_g5_i4;TRINITY_DN7809_c3_g4_i1;TRINITY_DN7620_c2_g1_i2;TRINITY_DN7861_c0_g3_i1;TRINITY_DN7551_c2_g4_i5;TRINITY_DN7540_c0_g2_i2;TRINITY_DN7691_c0_g1_i1;TRINITY_DN7691_c0_g3_i1;TRINITY_DN7815_c0_g1_i1;TRINITY_DN7535_c2_g6_i1;TRINITY_DN7716_c4_g10_i1;TRINITY_DN7815_c0_g2_i2;TRINITY_DN7796_c1_g7_i2;TRINITY_DN660…
C5-Branched dibasic acid metabolism	TRINITY_DN7691_c0_g1_i1;TRINITY_DN7691_c0_g3_i1;
Caffeine metabolism	TRINITY_DN7701_c1_g3_i3;TRINITY_DN7701_c1_g2_i1;TRINITY_DN7799_c0_g1_i2;TRINITY_DN7799_c0_g3_i3;
Calcium signaling pathway	TRINITY_DN7602_c4_g2_i8;TRINITY_DN6853_c0_g1_i1;TRINITY_DN7911_c5_g5_i3;TRINITY_DN7569_c1_g6_i1;TRINITY_DN7514_c2_g2_i4;TRINITY_DN7432_c5_g1_i1;TRINITY_DN8072_c0_g3_i1;TRINITY_DN8072_c0_g2_i2;TRINITY_DN7524_c1_g1_i15;TRINITY_DN6853_c0_g2_i1;TRINITY_DN7727_c0_g7_i3;TRINITY_DN7432_c5_g3_i1;TRINITY_DN7569_c1_g10_i1;TRINITY_DN7894_c3_g3_i1;TRINITY_DN7768_c1_g3_i1;TRINITY_DN7503_c1_g1_i3;TRINITY_DN756…
cAMP signaling pathway	TRINITY_DN7961_c3_g1_i9;TRINITY_DN7707_c2_g4_i1;TRINITY_DN8050_c2_g5_i2;TRINITY_DN8026_c1_g1_i4;TRINITY_DN7514_c2_g2_i4;TRINITY_DN7432_c5_g1_i1;TRINITY_DN8072_c0_g3_i1;TRINITY_DN8026_c2_g7_i1;TRINITY_DN8072_c0_g2_i2;TRINITY_DN7571_c6_g1_i4;TRINITY_DN8050_c2_g8_i1;TRINITY_DN7833_c3_g1_i3;TRINITY_DN8026_c2_g1_i1;TRINITY_DN7736_c1_g6_i3;TRINITY_DN7432_c5_g3_i1;TRINITY_DN7736_c1_g1_i1;TRINITY_DN7833_…
Caprolactam degradation	TRINITY_DN7809_c3_g2_i7;TRINITY_DN7809_c3_g4_i1;TRINITY_DN7484_c7_g7_i1;TRINITY_DN6603_c0_g1_i5;TRINITY_DN305_c0_g1_i2;
Carbapenem biosynthesis	TRINITY_DN7376_c1_g2_i2;TRINITY_DN7376_c1_g3_i2;TRINITY_DN7358_c3_g1_i3;
Carbohydrate digestion and absorption	TRINITY_DN7862_c1_g8_i2;TRINITY_DN6630_c0_g1_i5;TRINITY_DN7862_c1_g1_i1;TRINITY_DN7687_c1_g1_i4;TRINITY_DN5511_c0_g1_i1;TRINITY_DN7687_c1_g2_i1;TRINITY_DN6630_c0_g2_i1;TRINITY_DN5511_c0_g2_i1;TRINITY_DN7500_c2_g3_i1;TRINITY_DN4064_c0_g1_i1;TRINITY_DN55093_c0_g1_i1;
Carbon metabolism	TRINITY_DN7947_c0_g2_i21;TRINITY_DN7885_c3_g4_i3;TRINITY_DN7584_c2_g7_i1;TRINITY_DN7571_c4_g1_i3;TRINITY_DN7862_c1_g8_i2;TRINITY_DN8077_c2_g4_i2;TRINITY_DN7590_c3_g2_i3;TRINITY_DN7934_c2_g5_i2;TRINITY_DN6839_c0_g1_i9;TRINITY_DN7809_c3_g2_i7;TRINITY_DN7387_c1_g5_i2;TRINITY_DN7640_c6_g3_i4;TRINITY_DN7862_c1_g1_i1;TRINITY_DN8039_c5_g1_i1;TRINITY_DN8038_c4_g2_i5;TRINITY_DN7601_c0_g2_i5;TRINITY_DN7687…
Carotenoid biosynthesis	TRINITY_DN7544_c1_g2_i2;TRINITY_DN7544_c1_g4_i2;TRINITY_DN4307_c0_g1_i1;
Cell cycle	TRINITY_DN7796_c0_g7_i2;TRINITY_DN7576_c3_g3_i2;TRINITY_DN7974_c3_g7_i1;TRINITY_DN7914_c0_g5_i5;TRINITY_DN6886_c0_g2_i1;TRINITY_DN8082_c4_g2_i3;TRINITY_DN7113_c0_g1_i3;TRINITY_DN7811_c0_g1_i2;TRINITY_DN7989_c1_g3_i1;TRINITY_DN7811_c0_g2_i1;TRINITY_DN6886_c0_g1_i1;TRINITY_DN6882_c0_g3_i1;TRINITY_DN7560_c4_g11_i3;TRINITY_DN7003_c0_g1_i4;TRINITY_DN8045_c1_g8_i4;TRINITY_DN7418_c1_g3_i2;TRINITY_DN7989…
Cell cycle - yeast	TRINITY_DN7796_c0_g7_i2;TRINITY_DN7576_c3_g3_i2;TRINITY_DN7974_c3_g7_i1;TRINITY_DN6886_c0_g2_i1;TRINITY_DN8082_c4_g2_i3;TRINITY_DN7113_c0_g1_i3;TRINITY_DN7811_c0_g1_i2;TRINITY_DN7989_c1_g3_i1;TRINITY_DN7811_c0_g2_i1;TRINITY_DN6886_c0_g1_i1;TRINITY_DN6882_c0_g3_i1;TRINITY_DN8045_c1_g8_i4;TRINITY_DN7418_c1_g3_i2;TRINITY_DN7989_c1_g7_i1;TRINITY_DN7252_c5_g1_i1;TRINITY_DN7418_c1_g1_i1;TRINITY_DN6258_…
cGMP-PKG signaling pathway	TRINITY_DN8050_c2_g5_i2;TRINITY_DN8072_c0_g3_i1;TRINITY_DN8072_c0_g2_i2;TRINITY_DN7571_c6_g1_i4;TRINITY_DN8050_c2_g8_i1;TRINITY_DN7833_c3_g1_i3;TRINITY_DN7736_c1_g6_i3;TRINITY_DN7736_c1_g1_i1;TRINITY_DN7833_c3_g2_i3;TRINITY_DN7571_c6_g2_i2;TRINITY_DN7768_c1_g3_i1;TRINITY_DN7500_c2_g3_i1;TRINITY_DN7503_c1_g1_i3;TRINITY_DN7647_c1_g5_i4;
Chloroalkane and chloroalkene degradation	TRINITY_DN7257_c5_g8_i3;TRINITY_DN7696_c4_g2_i4;TRINITY_DN4973_c0_g1_i1;TRINITY_DN7257_c5_g2_i1;TRINITY_DN2495_c0_g1_i1;
Chlorocyclohexane and chlorobenzene degradation	TRINITY_DN4973_c0_g1_i1;TRINITY_DN7798_c1_g1_i1;TRINITY_DN7873_c4_g6_i1;TRINITY_DN7798_c2_g1_i1;TRINITY_DN7873_c4_g8_i1;TRINITY_DN2495_c0_g1_i1;
Cholesterol metabolism	TRINITY_DN7983_c1_g3_i5;TRINITY_DN7348_c2_g2_i1;TRINITY_DN7348_c2_g1_i1;TRINITY_DN7983_c1_g2_i4;TRINITY_DN7472_c4_g2_i2;TRINITY_DN7944_c1_g5_i5;TRINITY_DN7944_c1_g6_i1;TRINITY_DN7472_c4_g4_i2;
Circadian entrainment	TRINITY_DN7569_c1_g6_i1;TRINITY_DN7514_c2_g2_i4;TRINITY_DN7432_c5_g1_i1;TRINITY_DN7571_c6_g1_i4;TRINITY_DN7736_c1_g6_i3;TRINITY_DN7432_c5_g3_i1;TRINITY_DN7692_c3_g3_i1;TRINITY_DN7569_c1_g10_i1;TRINITY_DN7692_c3_g2_i1;TRINITY_DN7736_c1_g1_i1;TRINITY_DN7571_c6_g2_i2;TRINITY_DN7569_c1_g11_i1;
Circadian rhythm	TRINITY_DN7861_c0_g2_i1;TRINITY_DN6882_c0_g3_i1;TRINITY_DN8067_c1_g4_i2;TRINITY_DN7724_c1_g12_i1;TRINITY_DN7724_c1_g9_i3;TRINITY_DN8067_c1_g13_i1;TRINITY_DN7594_c3_g2_i1;TRINITY_DN7861_c0_g1_i1;TRINITY_DN7753_c3_g5_i2;TRINITY_DN7594_c3_g1_i1;
Citrate cycle (TCA cycle)	TRINITY_DN7885_c3_g4_i3;TRINITY_DN6839_c0_g1_i9;TRINITY_DN8038_c4_g2_i5;TRINITY_DN7601_c0_g2_i5;TRINITY_DN7888_c1_g3_i2;TRINITY_DN7748_c0_g3_i1;TRINITY_DN8038_c4_g3_i2;TRINITY_DN7748_c0_g2_i1;TRINITY_DN7636_c1_g6_i1;TRINITY_DN5997_c0_g1_i3;TRINITY_DN8088_c7_g6_i1;TRINITY_DN7574_c7_g5_i1;TRINITY_DN7574_c7_g2_i1;TRINITY_DN8054_c1_g2_i6;TRINITY_DN7407_c2_g2_i2;TRINITY_DN7130_c0_g1_i2;TRINITY_DN7612_…
Cyanoamino acid metabolism	TRINITY_DN7947_c0_g2_i21;TRINITY_DN4431_c0_g1_i1;TRINITY_DN7124_c0_g1_i4;TRINITY_DN7395_c2_g3_i5;TRINITY_DN7395_c2_g6_i1;TRINITY_DN7310_c0_g2_i2;TRINITY_DN7395_c1_g4_i1;TRINITY_DN4174_c0_g1_i1;TRINITY_DN7765_c0_g5_i1;TRINITY_DN6763_c0_g2_i2;TRINITY_DN4355_c0_g1_i2;TRINITY_DN6327_c0_g1_i1;TRINITY_DN7765_c0_g4_i1;TRINITY_DN6648_c0_g1_i4;TRINITY_DN7377_c0_g1_i1;TRINITY_DN6648_c0_g2_i2;TRINITY_DN6449…
Cysteine and methionine metabolism	TRINITY_DN8059_c0_g1_i8;TRINITY_DN7052_c0_g1_i6;TRINITY_DN7891_c1_g2_i1;TRINITY_DN7795_c0_g1_i2;TRINITY_DN7611_c4_g1_i5;TRINITY_DN8105_c2_g3_i1;TRINITY_DN7636_c1_g2_i1;TRINITY_DN7556_c4_g2_i4;TRINITY_DN8105_c2_g5_i4;TRINITY_DN7741_c6_g2_i4;TRINITY_DN7221_c0_g1_i4;TRINITY_DN7221_c0_g2_i4;TRINITY_DN8038_c1_g2_i2;TRINITY_DN8038_c1_g1_i1;TRINITY_DN6091_c0_g1_i4;TRINITY_DN7636_c1_g4_i1;TRINITY_DN6189_…
D-Arginine and D-ornithine metabolism	TRINITY_DN3907_c0_g1_i1;
Degradation of aromatic compounds	TRINITY_DN7590_c4_g7_i1;TRINITY_DN6988_c0_g1_i1;TRINITY_DN7696_c4_g2_i4;TRINITY_DN7837_c0_g4_i1;TRINITY_DN7484_c7_g7_i1;TRINITY_DN7837_c0_g3_i2;TRINITY_DN2263_c0_g1_i1;TRINITY_DN3604_c0_g1_i3;TRINITY_DN7873_c4_g6_i1;TRINITY_DN7873_c4_g8_i1;
Dioxin degradation	TRINITY_DN6988_c0_g1_i1;TRINITY_DN7837_c0_g4_i1;TRINITY_DN7837_c0_g3_i2;TRINITY_DN2263_c0_g1_i1;TRINITY_DN3604_c0_g1_i3;
DNA replication	TRINITY_DN7398_c0_g3_i1;TRINITY_DN7428_c2_g2_i2;TRINITY_DN7953_c2_g5_i1;TRINITY_DN7613_c0_g2_i4;TRINITY_DN7467_c1_g1_i3;TRINITY_DN7504_c8_g1_i1;TRINITY_DN7324_c2_g2_i2;TRINITY_DN7684_c0_g6_i1;TRINITY_DN7613_c0_g1_i1;TRINITY_DN7684_c0_g3_i2;TRINITY_DN9201_c0_g1_i1;TRINITY_DN7837_c0_g10_i1;TRINITY_DN7837_c0_g7_i1;TRINITY_DN1091_c0_g1_i1;TRINITY_DN8034_c2_g1_i1;TRINITY_DN7678_c1_g1_i1;TRINITY_DN7287…
Drug metabolism - cytochrome P450	TRINITY_DN1268_c0_g1_i2;TRINITY_DN7696_c4_g2_i4;TRINITY_DN7955_c1_g2_i5;TRINITY_DN7572_c1_g1_i1;TRINITY_DN241_c0_g1_i1;TRINITY_DN241_c0_g2_i1;TRINITY_DN5912_c0_g2_i1;TRINITY_DN7521_c3_g2_i1;TRINITY_DN7521_c3_g4_i1;TRINITY_DN7572_c1_g2_i3;TRINITY_DN9401_c0_g1_i1;
Drug metabolism - other enzymes	TRINITY_DN7146_c0_g3_i2;TRINITY_DN7701_c1_g3_i3;TRINITY_DN7701_c1_g2_i1;TRINITY_DN1268_c0_g1_i2;TRINITY_DN7922_c3_g2_i2;TRINITY_DN7788_c0_g3_i4;TRINITY_DN7580_c0_g2_i1;TRINITY_DN7788_c0_g2_i2;TRINITY_DN7955_c1_g2_i5;TRINITY_DN7146_c0_g4_i1;TRINITY_DN7572_c1_g1_i1;TRINITY_DN8007_c0_g3_i1;TRINITY_DN7922_c3_g1_i1;TRINITY_DN5912_c0_g2_i1;TRINITY_DN7551_c0_g2_i2;TRINITY_DN7449_c0_g2_i2;TRINITY_DN7521_…
Endocytosis	TRINITY_DN7888_c1_g1_i2;TRINITY_DN7407_c1_g1_i2;TRINITY_DN7278_c0_g1_i1;TRINITY_DN7961_c3_g1_i9;TRINITY_DN7707_c2_g4_i1;TRINITY_DN7635_c4_g4_i1;TRINITY_DN7635_c4_g1_i1;TRINITY_DN7549_c0_g10_i1;TRINITY_DN7866_c3_g6_i4;TRINITY_DN8062_c1_g3_i1;TRINITY_DN7546_c2_g6_i3;TRINITY_DN7888_c1_g4_i1;TRINITY_DN7776_c2_g2_i1;TRINITY_DN7407_c1_g6_i3;TRINITY_DN7972_c4_g3_i1;TRINITY_DN7974_c2_g2_i2;TRINITY_DN8026…
ErbB signaling pathway	TRINITY_DN7304_c7_g5_i1;TRINITY_DN7304_c7_g6_i1;TRINITY_DN7914_c0_g5_i5;TRINITY_DN7569_c1_g6_i1;TRINITY_DN6951_c0_g2_i1;TRINITY_DN6951_c0_g1_i1;TRINITY_DN7571_c6_g1_i4;TRINITY_DN7914_c0_g9_i1;TRINITY_DN7976_c2_g1_i2;TRINITY_DN7976_c3_g3_i1;TRINITY_DN7569_c1_g10_i1;TRINITY_DN7571_c6_g2_i2;TRINITY_DN7976_c2_g2_i2;TRINITY_DN7976_c3_g2_i4;TRINITY_DN7569_c1_g11_i1;
Ether lipid metabolism	TRINITY_DN7961_c3_g1_i9;TRINITY_DN7707_c2_g4_i1;TRINITY_DN7424_c4_g4_i1;TRINITY_DN8026_c1_g1_i4;TRINITY_DN7424_c4_g2_i1;TRINITY_DN8026_c2_g7_i1;TRINITY_DN7878_c1_g11_i1;TRINITY_DN6785_c0_g2_i1;TRINITY_DN7698_c2_g1_i2;TRINITY_DN7698_c2_g3_i1;TRINITY_DN7689_c3_g3_i1;TRINITY_DN7698_c2_g2_i6;TRINITY_DN16091_c0_g1_i1;TRINITY_DN8026_c2_g1_i1;TRINITY_DN7689_c3_g7_i1;TRINITY_DN7531_c0_g4_i1;TRINITY_DN769…
Fat digestion and absorption	TRINITY_DN7262_c3_g1_i1;TRINITY_DN7262_c3_g4_i3;TRINITY_DN7547_c0_g1_i3;TRINITY_DN7170_c0_g3_i1;
Fatty acid biosynthesis	TRINITY_DN7534_c3_g7_i1;TRINITY_DN7450_c4_g9_i1;TRINITY_DN7035_c0_g2_i1;TRINITY_DN7450_c4_g7_i1;TRINITY_DN7768_c0_g3_i14;TRINITY_DN7827_c3_g1_i1;TRINITY_DN7768_c0_g9_i2;TRINITY_DN7827_c3_g2_i2;TRINITY_DN7331_c0_g2_i1;TRINITY_DN7924_c3_g2_i1;TRINITY_DN5987_c0_g1_i1;TRINITY_DN7442_c0_g1_i1;TRINITY_DN1613_c0_g1_i1;TRINITY_DN4588_c0_g1_i2;TRINITY_DN2878_c0_g1_i2;TRINITY_DN213_c0_g1_i1;
Fatty acid degradation	TRINITY_DN7768_c0_g3_i14;TRINITY_DN6939_c0_g2_i3;TRINITY_DN6939_c0_g1_i1;TRINITY_DN7809_c3_g2_i7;TRINITY_DN7827_c3_g1_i1;TRINITY_DN7809_c3_g4_i1;TRINITY_DN7257_c5_g8_i3;TRINITY_DN7696_c4_g2_i4;TRINITY_DN7768_c0_g9_i2;TRINITY_DN7450_c1_g2_i3;TRINITY_DN7827_c3_g2_i2;TRINITY_DN7815_c0_g1_i1;TRINITY_DN7815_c0_g2_i2;TRINITY_DN7331_c0_g2_i1;TRINITY_DN6603_c0_g1_i5;TRINITY_DN7333_c3_g3_i3;TRINITY_DN22_c…
Fatty acid elongation	TRINITY_DN7238_c0_g2_i2;TRINITY_DN7809_c3_g2_i7;TRINITY_DN7809_c3_g4_i1;TRINITY_DN7721_c5_g1_i5;TRINITY_DN6603_c0_g1_i5;TRINITY_DN7721_c5_g6_i2;TRINITY_DN16514_c0_g1_i1;TRINITY_DN7238_c0_g1_i1;TRINITY_DN16506_c0_g1_i1;TRINITY_DN6695_c0_g1_i1;TRINITY_DN6695_c0_g2_i1;TRINITY_DN305_c0_g1_i2;
Fatty acid metabolism	TRINITY_DN7534_c3_g7_i1;TRINITY_DN7450_c4_g9_i1;TRINITY_DN7035_c0_g2_i1;TRINITY_DN7450_c4_g7_i1;TRINITY_DN7238_c0_g2_i2;TRINITY_DN8052_c4_g2_i4;TRINITY_DN7768_c0_g3_i14;TRINITY_DN7809_c3_g2_i7;TRINITY_DN7827_c3_g1_i1;TRINITY_DN7809_c3_g4_i1;TRINITY_DN8052_c4_g1_i1;TRINITY_DN7768_c0_g9_i2;TRINITY_DN7827_c3_g2_i2;TRINITY_DN7211_c3_g14_i2;TRINITY_DN7815_c0_g1_i1;TRINITY_DN7815_c0_g2_i2;TRINITY_DN733…
Flavone and flavonol biosynthesis	TRINITY_DN8007_c0_g3_i1;
Fluorobenzoate degradation	TRINITY_DN7798_c1_g1_i1;TRINITY_DN7873_c4_g6_i1;TRINITY_DN7798_c2_g1_i1;TRINITY_DN7873_c4_g8_i1;
Folate biosynthesis	TRINITY_DN7940_c0_g2_i7;TRINITY_DN6887_c0_g1_i9;TRINITY_DN7415_c1_g2_i2;TRINITY_DN7449_c0_g1_i2;TRINITY_DN7492_c2_g2_i1;TRINITY_DN8054_c1_g3_i1;TRINITY_DN7743_c3_g15_i1;TRINITY_DN7961_c0_g1_i2;TRINITY_DN8009_c1_g3_i1;TRINITY_DN7743_c3_g11_i1;TRINITY_DN8054_c1_g4_i1;TRINITY_DN7492_c4_g2_i1;TRINITY_DN4720_c0_g1_i1;TRINITY_DN7749_c0_g1_i2;TRINITY_DN7415_c1_g3_i1;TRINITY_DN7469_c1_g14_i1;TRINITY_DN30…
Fructose and mannose metabolism	TRINITY_DN7619_c3_g2_i4;TRINITY_DN7584_c2_g7_i1;TRINITY_DN7862_c1_g8_i2;TRINITY_DN7862_c1_g1_i1;TRINITY_DN7687_c1_g1_i4;TRINITY_DN7812_c3_g6_i1;TRINITY_DN7565_c1_g2_i38;TRINITY_DN7790_c1_g2_i2;TRINITY_DN7122_c0_g1_i2;TRINITY_DN8055_c0_g5_i2;TRINITY_DN5511_c0_g1_i1;TRINITY_DN7687_c1_g2_i1;TRINITY_DN7714_c1_g3_i1;TRINITY_DN7454_c5_g6_i1;TRINITY_DN7521_c3_g3_i2;TRINITY_DN8034_c0_g1_i1;TRINITY_DN5511…
Galactose metabolism	TRINITY_DN8107_c2_g2_i12;TRINITY_DN7862_c1_g8_i2;TRINITY_DN7403_c0_g4_i1;TRINITY_DN7403_c0_g5_i3;TRINITY_DN7862_c1_g1_i1;TRINITY_DN6556_c0_g2_i2;TRINITY_DN7687_c1_g1_i4;TRINITY_DN7285_c2_g1_i2;TRINITY_DN7146_c0_g2_i2;TRINITY_DN1174_c0_g1_i1;TRINITY_DN6556_c0_g1_i4;TRINITY_DN5511_c0_g1_i1;TRINITY_DN7687_c1_g2_i1;TRINITY_DN7454_c5_g6_i1;TRINITY_DN7285_c2_g2_i1;TRINITY_DN7319_c0_g2_i1;TRINITY_DN8007…
Glutathione metabolism	TRINITY_DN7894_c3_g5_i2;TRINITY_DN7427_c4_g3_i5;TRINITY_DN7740_c1_g4_i2;TRINITY_DN7748_c0_g3_i1;TRINITY_DN7748_c0_g2_i1;TRINITY_DN1268_c0_g1_i2;TRINITY_DN7922_c3_g2_i2;TRINITY_DN7580_c0_g2_i1;TRINITY_DN7427_c4_g2_i1;TRINITY_DN7947_c0_g1_i3;TRINITY_DN7955_c1_g2_i5;TRINITY_DN7774_c2_g6_i1;TRINITY_DN6813_c0_g1_i1;TRINITY_DN6763_c0_g2_i2;TRINITY_DN8015_c2_g1_i2;TRINITY_DN7740_c1_g5_i1;TRINITY_DN8015_…
Glycerolipid metabolism	TRINITY_DN7584_c2_g7_i1;TRINITY_DN7262_c3_g1_i1;TRINITY_DN6879_c0_g1_i9;TRINITY_DN7850_c3_g11_i1;TRINITY_DN5078_c0_g1_i1;TRINITY_DN7086_c0_g1_i1;TRINITY_DN7257_c5_g8_i3;TRINITY_DN7262_c3_g4_i3;TRINITY_DN7850_c3_g13_i1;TRINITY_DN6264_c0_g3_i2;TRINITY_DN16091_c0_g1_i1;TRINITY_DN7531_c0_g4_i1;TRINITY_DN8034_c0_g1_i1;TRINITY_DN7440_c1_g3_i3;TRINITY_DN7409_c1_g1_i1;TRINITY_DN7351_c2_g15_i1;TRINITY_DN6…
Glycerophospholipid metabolism	TRINITY_DN7835_c2_g2_i2;TRINITY_DN7668_c3_g1_i4;TRINITY_DN8096_c1_g1_i13;TRINITY_DN7961_c3_g1_i9;TRINITY_DN7707_c2_g4_i1;TRINITY_DN7489_c2_g6_i1;TRINITY_DN7237_c3_g4_i1;TRINITY_DN7968_c4_g3_i7;TRINITY_DN7424_c4_g4_i1;TRINITY_DN8026_c1_g1_i4;TRINITY_DN7424_c4_g2_i1;TRINITY_DN7559_c6_g5_i2;TRINITY_DN7535_c2_g1_i1;TRINITY_DN8026_c2_g7_i1;TRINITY_DN7850_c3_g11_i1;TRINITY_DN5078_c0_g1_i1;TRINITY_DN783…
Glycine, serine and threonine metabolism	TRINITY_DN7362_c0_g8_i1;TRINITY_DN7795_c0_g1_i2;TRINITY_DN7934_c2_g5_i2;TRINITY_DN7218_c0_g4_i6;TRINITY_DN7820_c0_g2_i9;TRINITY_DN7218_c0_g2_i3;TRINITY_DN6219_c1_g1_i2;TRINITY_DN7741_c6_g2_i4;TRINITY_DN8038_c1_g2_i2;TRINITY_DN8038_c1_g1_i1;TRINITY_DN7653_c5_g4_i1;TRINITY_DN8012_c3_g2_i1;TRINITY_DN7362_c0_g1_i3;TRINITY_DN4058_c0_g1_i1;TRINITY_DN7795_c0_g6_i1;TRINITY_DN7626_c2_g1_i1;TRINITY_DN8036_…
Glycolysis_Gluconeogenesis	TRINITY_DN8107_c2_g2_i12;TRINITY_DN7885_c3_g4_i3;TRINITY_DN7862_c1_g8_i2;TRINITY_DN7640_c6_g3_i4;TRINITY_DN7862_c1_g1_i1;TRINITY_DN7601_c0_g2_i5;TRINITY_DN7687_c1_g1_i4;TRINITY_DN7812_c3_g6_i1;TRINITY_DN7257_c5_g8_i3;TRINITY_DN7696_c4_g2_i4;TRINITY_DN5511_c0_g1_i1;TRINITY_DN7687_c1_g2_i1;TRINITY_DN7714_c1_g3_i1;TRINITY_DN7454_c5_g6_i1;TRINITY_DN5511_c0_g2_i1;TRINITY_DN7130_c0_g1_i2;TRINITY_DN7130…
Glycosaminoglycan degradation	TRINITY_DN7281_c0_g3_i1;TRINITY_DN7281_c0_g1_i1;TRINITY_DN6680_c0_g2_i1;TRINITY_DN6680_c0_g1_i1;TRINITY_DN8007_c0_g3_i1;
Glycosphingolipid biosynthesis - ganglio series	TRINITY_DN7281_c0_g3_i1;TRINITY_DN7281_c0_g1_i1;
Glycosphingolipid biosynthesis - globo and isoglobo series	TRINITY_DN7281_c0_g3_i1;TRINITY_DN7281_c0_g1_i1;TRINITY_DN4179_c0_g1_i3;TRINITY_DN188_c0_g1_i1;TRINITY_DN12707_c0_g1_i1;
Glycosylphosphatidylinositol (GPI)-anchor biosynthesis	TRINITY_DN8080_c3_g5_i2;TRINITY_DN7318_c1_g4_i1;TRINITY_DN8102_c2_g6_i2;TRINITY_DN7605_c4_g7_i1;TRINITY_DN7464_c4_g3_i1;TRINITY_DN7707_c4_g4_i1;TRINITY_DN7318_c1_g5_i1;TRINITY_DN7489_c1_g1_i3;TRINITY_DN4076_c0_g1_i2;TRINITY_DN7489_c1_g2_i1;TRINITY_DN3715_c0_g1_i1;TRINITY_DN7747_c4_g3_i1;TRINITY_DN8069_c1_g11_i1;TRINITY_DN6625_c0_g2_i3;TRINITY_DN6181_c0_g1_i4;TRINITY_DN8080_c3_g4_i1;TRINITY_DN3486…
Glyoxylate and dicarboxylate metabolism	TRINITY_DN7947_c0_g2_i21;TRINITY_DN7471_c1_g2_i7;TRINITY_DN7571_c4_g1_i3;TRINITY_DN7471_c1_g3_i7;TRINITY_DN7640_c6_g3_i4;TRINITY_DN8038_c4_g2_i5;TRINITY_DN8038_c4_g3_i2;TRINITY_DN7834_c1_g2_i1;TRINITY_DN8101_c4_g1_i4;TRINITY_DN6989_c0_g1_i1;TRINITY_DN7073_c0_g2_i1;TRINITY_DN7653_c5_g4_i1;TRINITY_DN7571_c4_g3_i1;TRINITY_DN7073_c0_g1_i2;TRINITY_DN7949_c0_g3_i3;TRINITY_DN7815_c0_g1_i1;TRINITY_DN7815…
Histidine metabolism	TRINITY_DN7880_c1_g2_i13;TRINITY_DN7877_c1_g2_i6;TRINITY_DN7532_c0_g3_i2;TRINITY_DN7877_c1_g5_i3;TRINITY_DN7880_c1_g4_i2;TRINITY_DN7077_c0_g1_i2;TRINITY_DN7257_c5_g8_i3;TRINITY_DN7077_c0_g3_i2;TRINITY_DN7532_c0_g5_i2;TRINITY_DN6458_c0_g1_i1;TRINITY_DN6458_c0_g3_i2;TRINITY_DN7920_c4_g3_i1;TRINITY_DN241_c0_g1_i1;TRINITY_DN7257_c5_g2_i1;TRINITY_DN241_c0_g2_i1;TRINITY_DN6679_c0_g1_i1;TRINITY_DN6679_c…
Homologous recombination	TRINITY_DN7956_c2_g5_i1;TRINITY_DN7956_c2_g1_i1;TRINITY_DN7003_c0_g1_i4;TRINITY_DN7875_c2_g1_i2;TRINITY_DN6824_c0_g1_i4;TRINITY_DN9201_c0_g1_i1;TRINITY_DN8034_c2_g1_i1;TRINITY_DN7585_c1_g4_i1;TRINITY_DN7732_c5_g1_i2;TRINITY_DN7401_c3_g3_i1;TRINITY_DN926_c0_g1_i2;TRINITY_DN9245_c0_g1_i1;TRINITY_DN331_c0_g1_i1;TRINITY_DN8102_c0_g1_i1;TRINITY_DN11073_c0_g1_i1;TRINITY_DN4344_c0_g1_i1;TRINITY_DN4689_c…
Indole diterpene alkaloid biosynthesis	TRINITY_DN7798_c6_g2_i1;
Inositol phosphate metabolism	TRINITY_DN7552_c0_g1_i8;TRINITY_DN7407_c1_g1_i2;TRINITY_DN7754_c6_g3_i3;TRINITY_DN7754_c6_g9_i1;TRINITY_DN7675_c2_g1_i1;TRINITY_DN6853_c0_g1_i1;TRINITY_DN7484_c5_g2_i3;TRINITY_DN7640_c5_g3_i1;TRINITY_DN7407_c1_g6_i3;TRINITY_DN7968_c4_g3_i7;TRINITY_DN7385_c1_g2_i1;TRINITY_DN6972_c0_g1_i9;TRINITY_DN7385_c1_g1_i2;TRINITY_DN7090_c0_g2_i1;TRINITY_DN7327_c1_g14_i1;TRINITY_DN6853_c0_g2_i1;TRINITY_DN7640…
Isoquinoline alkaloid biosynthesis	TRINITY_DN7362_c0_g8_i1;TRINITY_DN7052_c0_g1_i6;TRINITY_DN7656_c6_g6_i1;TRINITY_DN2454_c0_g1_i1;TRINITY_DN6112_c0_g1_i10;TRINITY_DN7362_c0_g1_i3;TRINITY_DN4958_c0_g1_i2;TRINITY_DN6239_c0_g1_i1;TRINITY_DN7626_c2_g1_i1;TRINITY_DN7127_c0_g2_i1;TRINITY_DN8580_c0_g1_i1;TRINITY_DN3170_c0_g1_i1;TRINITY_DN7547_c0_g1_i3;TRINITY_DN4540_c0_g1_i1;TRINITY_DN11449_c0_g1_i1;TRINITY_DN11079_c0_g1_i1;TRINITY_DN53…
KEGG-pathways	Unigenes;
Limonene and pinene degradation	TRINITY_DN7257_c5_g8_i3;TRINITY_DN7257_c5_g2_i1;
Linoleic acid metabolism	TRINITY_DN7424_c4_g4_i1;TRINITY_DN7424_c4_g2_i1;TRINITY_DN16091_c0_g1_i1;TRINITY_DN7531_c0_g4_i1;
Lipoic acid metabolism	TRINITY_DN7354_c1_g1_i1;TRINITY_DN7354_c1_g2_i1;
Lysine biosynthesis	TRINITY_DN7052_c0_g1_i6;TRINITY_DN8055_c0_g11_i3;TRINITY_DN8055_c0_g3_i7;TRINITY_DN6287_c0_g3_i2;TRINITY_DN7741_c6_g2_i4;TRINITY_DN7754_c6_g6_i2;TRINITY_DN6287_c0_g1_i3;TRINITY_DN8038_c3_g1_i1;TRINITY_DN8003_c2_g4_i1;TRINITY_DN7792_c1_g3_i3;TRINITY_DN7741_c6_g4_i1;
Lysine degradation	TRINITY_DN7980_c1_g7_i8;TRINITY_DN7722_c2_g2_i1;TRINITY_DN7323_c2_g2_i2;TRINITY_DN7323_c2_g1_i1;TRINITY_DN8055_c0_g11_i3;TRINITY_DN7809_c3_g2_i7;TRINITY_DN7820_c0_g2_i9;TRINITY_DN6187_c0_g1_i1;TRINITY_DN8055_c0_g3_i7;TRINITY_DN7980_c1_g5_i4;TRINITY_DN7434_c4_g2_i1;TRINITY_DN7434_c4_g1_i1;TRINITY_DN7809_c3_g4_i1;TRINITY_DN7257_c5_g8_i3;TRINITY_DN7759_c1_g1_i6;TRINITY_DN5689_c0_g1_i1;TRINITY_DN7761…
Lysosome	TRINITY_DN7888_c1_g1_i2;TRINITY_DN7785_c1_g1_i4;TRINITY_DN8049_c1_g6_i3;TRINITY_DN7339_c3_g6_i2;TRINITY_DN7888_c1_g4_i1;TRINITY_DN8049_c1_g1_i1;TRINITY_DN7927_c3_g1_i7;TRINITY_DN7348_c2_g2_i1;TRINITY_DN7000_c0_g2_i3;TRINITY_DN7656_c6_g1_i2;TRINITY_DN7348_c2_g1_i1;TRINITY_DN7958_c4_g9_i2;TRINITY_DN7281_c0_g3_i1;TRINITY_DN7281_c0_g1_i1;TRINITY_DN7339_c3_g2_i1;TRINITY_DN7994_c3_g1_i1;TRINITY_DN7599_…
Mannose type O-glycan biosynthesis	TRINITY_DN7916_c1_g1_i18;TRINITY_DN7392_c4_g8_i1;TRINITY_DN7916_c1_g4_i2;TRINITY_DN7853_c1_g3_i1;TRINITY_DN7853_c1_g2_i1;
MAPK signaling pathway	TRINITY_DN7927_c3_g4_i1;TRINITY_DN7407_c1_g1_i2;TRINITY_DN7470_c0_g2_i5;TRINITY_DN7927_c3_g8_i9;TRINITY_DN8073_c1_g7_i1;TRINITY_DN7754_c6_g3_i3;TRINITY_DN7754_c6_g9_i1;TRINITY_DN7668_c3_g1_i4;TRINITY_DN8073_c1_g2_i1;TRINITY_DN7647_c1_g4_i3;TRINITY_DN7522_c1_g2_i4;TRINITY_DN7877_c0_g1_i1;TRINITY_DN7438_c5_g1_i3;TRINITY_DN7442_c1_g2_i4;TRINITY_DN6258_c0_g1_i1;TRINITY_DN7707_c2_g1_i3;TRINITY_DN7776_…
MAPK signaling pathway - yeast	TRINITY_DN7407_c1_g1_i2;TRINITY_DN7470_c0_g2_i5;TRINITY_DN8073_c1_g7_i1;TRINITY_DN7754_c6_g3_i3;TRINITY_DN7754_c6_g9_i1;TRINITY_DN7668_c3_g1_i4;TRINITY_DN8073_c1_g2_i1;TRINITY_DN7647_c1_g4_i3;TRINITY_DN7522_c1_g2_i4;TRINITY_DN7877_c0_g1_i1;TRINITY_DN7438_c5_g1_i3;TRINITY_DN7442_c1_g2_i4;TRINITY_DN6258_c0_g1_i1;TRINITY_DN7707_c2_g1_i3;TRINITY_DN7776_c2_g2_i1;TRINITY_DN7569_c1_g6_i1;TRINITY_DN7407_…
Meiosis - yeast	TRINITY_DN7304_c7_g5_i1;TRINITY_DN7385_c3_g6_i1;TRINITY_DN7385_c3_g1_i3;TRINITY_DN7723_c0_g1_i1;TRINITY_DN7304_c7_g6_i1;TRINITY_DN7914_c0_g2_i2;TRINITY_DN6886_c0_g2_i1;TRINITY_DN7704_c1_g5_i10;TRINITY_DN7989_c1_g3_i1;TRINITY_DN6886_c0_g1_i1;TRINITY_DN7432_c4_g2_i2;TRINITY_DN8045_c1_g8_i4;TRINITY_DN7989_c1_g7_i1;TRINITY_DN6258_c0_g1_i1;TRINITY_DN7432_c4_g4_i1;TRINITY_DN8099_c4_g10_i1;TRINITY_DN805…
Metabolic pathways	TRINITY_DN8107_c2_g2_i12;TRINITY_DN7916_c1_g1_i18;TRINITY_DN7894_c3_g5_i2;TRINITY_DN7947_c0_g2_i21;TRINITY_DN7940_c0_g2_i7;TRINITY_DN7146_c0_g3_i2;TRINITY_DN7016_c0_g3_i1;TRINITY_DN7880_c1_g2_i13;TRINITY_DN7362_c0_g8_i1;TRINITY_DN7552_c0_g1_i8;TRINITY_DN7407_c1_g1_i2;TRINITY_DN8073_c1_g7_i1;TRINITY_DN7754_c6_g3_i3;TRINITY_DN7885_c3_g4_i3;TRINITY_DN7575_c0_g1_i18;TRINITY_DN7754_c6_g9_i1;TRINITY_DN…
Metabolism of xenobiotics by cytochrome P450	TRINITY_DN1268_c0_g1_i2;TRINITY_DN7696_c4_g2_i4;TRINITY_DN7988_c4_g2_i1;TRINITY_DN7955_c1_g2_i5;TRINITY_DN7572_c1_g1_i1;TRINITY_DN241_c0_g1_i1;TRINITY_DN241_c0_g2_i1;TRINITY_DN5912_c0_g2_i1;TRINITY_DN7521_c3_g2_i1;TRINITY_DN7521_c3_g4_i1;TRINITY_DN7572_c1_g2_i3;TRINITY_DN9401_c0_g1_i1;
Methane metabolism	TRINITY_DN7584_c2_g7_i1;TRINITY_DN7640_c6_g3_i4;TRINITY_DN7644_c0_g9_i4;TRINITY_DN7812_c3_g6_i1;TRINITY_DN7218_c0_g4_i6;TRINITY_DN7218_c0_g2_i3;TRINITY_DN5765_c0_g1_i3;TRINITY_DN7696_c4_g2_i4;TRINITY_DN7957_c3_g1_i6;TRINITY_DN7714_c1_g3_i1;TRINITY_DN7454_c5_g6_i1;TRINITY_DN8034_c0_g1_i1;TRINITY_DN55609_c0_g1_i2;TRINITY_DN8036_c1_g5_i2;TRINITY_DN8012_c2_g5_i3;TRINITY_DN6177_c0_g1_i2;TRINITY_DN7621…
Microbial metabolism in diverse environments	TRINITY_DN8107_c2_g2_i12;TRINITY_DN7016_c0_g3_i1;TRINITY_DN7885_c3_g4_i3;TRINITY_DN7584_c2_g7_i1;TRINITY_DN7471_c1_g2_i7;TRINITY_DN7980_c1_g7_i8;TRINITY_DN7407_c2_g4_i2;TRINITY_DN7554_c2_g3_i3;TRINITY_DN7534_c3_g7_i1;TRINITY_DN7571_c4_g1_i3;TRINITY_DN7701_c1_g3_i3;TRINITY_DN7471_c1_g3_i7;TRINITY_DN7862_c1_g8_i2;TRINITY_DN7965_c0_g4_i1;TRINITY_DN7016_c0_g1_i3;TRINITY_DN8023_c1_g1_i11;TRINITY_DN807…
Mineral absorption	TRINITY_DN7444_c6_g1_i3;TRINITY_DN7574_c5_g1_i2;TRINITY_DN7500_c2_g3_i1;TRINITY_DN7574_c5_g2_i1;TRINITY_DN7444_c7_g1_i1;TRINITY_DN3580_c0_g1_i1;TRINITY_DN4389_c0_g1_i1;TRINITY_DN11210_c0_g1_i1;TRINITY_DN8098_c1_g6_i1;
Mismatch repair	TRINITY_DN7428_c2_g2_i2;TRINITY_DN6954_c0_g1_i4;TRINITY_DN7287_c1_g1_i1;TRINITY_DN7504_c8_g1_i1;TRINITY_DN7324_c2_g2_i2;TRINITY_DN9201_c0_g1_i1;TRINITY_DN7837_c0_g10_i1;TRINITY_DN7837_c0_g7_i1;TRINITY_DN7731_c1_g5_i1;TRINITY_DN8034_c2_g1_i1;TRINITY_DN7731_c1_g8_i1;TRINITY_DN7678_c1_g1_i1;TRINITY_DN7504_c8_g2_i1;TRINITY_DN7324_c2_g6_i1;TRINITY_DN6323_c0_g1_i8;TRINITY_DN3949_c0_g1_i2;TRINITY_DN5193…
Mitophagy - yeast	TRINITY_DN7407_c1_g1_i2;TRINITY_DN7304_c7_g5_i1;TRINITY_DN7470_c0_g2_i5;TRINITY_DN7734_c4_g1_i1;TRINITY_DN7304_c7_g6_i1;TRINITY_DN7568_c2_g2_i1;TRINITY_DN7442_c1_g2_i4;TRINITY_DN7898_c6_g5_i1;TRINITY_DN7569_c1_g6_i1;TRINITY_DN7407_c1_g6_i3;TRINITY_DN7470_c0_g4_i1;TRINITY_DN7641_c0_g3_i1;TRINITY_DN4275_c0_g1_i1;TRINITY_DN7493_c0_g1_i2;TRINITY_DN7696_c0_g2_i1;TRINITY_DN7696_c0_g1_i1;TRINITY_DN7688_…
mRNA surveillance pathway	TRINITY_DN7548_c1_g2_i3;TRINITY_DN7258_c1_g3_i8;TRINITY_DN7782_c3_g1_i11;TRINITY_DN7687_c2_g3_i6;TRINITY_DN8061_c1_g2_i1;TRINITY_DN8050_c2_g5_i2;TRINITY_DN7312_c0_g3_i2;TRINITY_DN7972_c3_g2_i5;TRINITY_DN7548_c1_g3_i2;TRINITY_DN7880_c1_g6_i3;TRINITY_DN7880_c1_g5_i1;TRINITY_DN7595_c2_g1_i2;TRINITY_DN7687_c2_g4_i11;TRINITY_DN7787_c4_g1_i2;TRINITY_DN7892_c2_g2_i1;TRINITY_DN3050_c0_g1_i1;TRINITY_DN797…
Naphthalene degradation	TRINITY_DN6988_c0_g1_i1;TRINITY_DN7696_c4_g2_i4;TRINITY_DN7837_c0_g4_i1;TRINITY_DN7837_c0_g3_i2;TRINITY_DN2263_c0_g1_i1;TRINITY_DN3604_c0_g1_i3;
N-Glycan biosynthesis	TRINITY_DN7991_c0_g1_i6;TRINITY_DN7928_c0_g2_i3;TRINITY_DN8018_c2_g2_i2;TRINITY_DN7658_c6_g5_i2;TRINITY_DN8018_c2_g5_i2;TRINITY_DN8037_c1_g1_i9;TRINITY_DN7991_c0_g6_i1;TRINITY_DN14347_c0_g1_i1;TRINITY_DN7645_c3_g2_i1;TRINITY_DN7645_c3_g1_i1;TRINITY_DN6107_c0_g1_i2;TRINITY_DN4262_c0_g1_i2;TRINITY_DN7329_c1_g1_i1;TRINITY_DN8102_c2_g9_i1;TRINITY_DN3888_c0_g1_i1;TRINITY_DN7070_c0_g1_i2;TRINITY_DN5180…
Nicotinate and nicotinamide metabolism	TRINITY_DN7980_c1_g7_i8;TRINITY_DN7565_c1_g4_i3;TRINITY_DN1214_c0_g1_i1;TRINITY_DN7857_c1_g6_i1;TRINITY_DN7788_c0_g8_i1;TRINITY_DN7980_c1_g5_i4;TRINITY_DN2082_c0_g1_i1;TRINITY_DN7950_c2_g3_i1;TRINITY_DN3157_c0_g1_i1;TRINITY_DN7998_c0_g3_i2;TRINITY_DN2436_c0_g1_i1;TRINITY_DN9165_c0_g1_i1;TRINITY_DN7565_c1_g11_i1;TRINITY_DN8152_c0_g1_i1;TRINITY_DN6720_c1_g2_i2;TRINITY_DN7997_c2_g1_i2;TRINITY_DN6720…
Nitrogen metabolism	TRINITY_DN7947_c0_g2_i21;TRINITY_DN7554_c2_g3_i3;TRINITY_DN8023_c1_g1_i11;TRINITY_DN7856_c4_g4_i2;TRINITY_DN7444_c5_g3_i3;TRINITY_DN7786_c0_g3_i1;TRINITY_DN8023_c1_g5_i2;TRINITY_DN8060_c0_g2_i3;TRINITY_DN8101_c4_g1_i4;TRINITY_DN8060_c0_g6_i1;TRINITY_DN7554_c2_g5_i2;TRINITY_DN7310_c0_g2_i2;TRINITY_DN3456_c0_g1_i1;TRINITY_DN7949_c0_g3_i3;TRINITY_DN6656_c1_g2_i1;TRINITY_DN7906_c1_g1_i4;TRINITY_DN794…
Non-homologous end-joining	TRINITY_DN7956_c2_g5_i1;TRINITY_DN7908_c4_g2_i6;TRINITY_DN7956_c2_g1_i1;TRINITY_DN6824_c0_g1_i4;TRINITY_DN7876_c2_g4_i1;TRINITY_DN5739_c0_g2_i1;TRINITY_DN5739_c0_g1_i1;TRINITY_DN6605_c0_g1_i3;TRINITY_DN7511_c2_g1_i1;TRINITY_DN198_c0_g1_i1;TRINITY_DN926_c0_g1_i2;TRINITY_DN7753_c2_g1_i1;TRINITY_DN7753_c2_g2_i1;TRINITY_DN4306_c0_g1_i1;TRINITY_DN5895_c0_g1_i1;
Nucleotide excision repair	TRINITY_DN7398_c0_g3_i1;TRINITY_DN7428_c2_g2_i2;TRINITY_DN7953_c2_g5_i1;TRINITY_DN7678_c2_g3_i1;TRINITY_DN7442_c0_g2_i1;TRINITY_DN8074_c3_g8_i1;TRINITY_DN8074_c3_g3_i14;TRINITY_DN7560_c4_g11_i3;TRINITY_DN7504_c8_g1_i1;TRINITY_DN7324_c2_g2_i2;TRINITY_DN9201_c0_g1_i1;TRINITY_DN7837_c0_g10_i1;TRINITY_DN7837_c0_g7_i1;TRINITY_DN6471_c0_g1_i1;TRINITY_DN5793_c0_g1_i1;TRINITY_DN9248_c0_g1_i1;TRINITY_DN80…
One carbon pool by folate	TRINITY_DN8077_c2_g4_i2;TRINITY_DN7712_c1_g3_i1;TRINITY_DN7712_c1_g2_i3;TRINITY_DN7986_c1_g2_i2;TRINITY_DN7538_c4_g7_i2;TRINITY_DN7506_c8_g2_i1;TRINITY_DN7986_c1_g7_i2;TRINITY_DN7372_c0_g2_i4;TRINITY_DN7877_c1_g4_i2;TRINITY_DN4118_c0_g1_i1;TRINITY_DN7372_c0_g3_i1;TRINITY_DN6648_c0_g1_i4;TRINITY_DN6648_c0_g2_i2;TRINITY_DN5830_c0_g1_i1;TRINITY_DN6808_c0_g2_i2;TRINITY_DN7504_c4_g1_i2;TRINITY_DN7506_…
Other glycan degradation	TRINITY_DN8049_c1_g6_i3;TRINITY_DN7403_c0_g4_i1;TRINITY_DN7611_c4_g10_i1;TRINITY_DN7403_c0_g5_i3;TRINITY_DN8049_c1_g1_i1;TRINITY_DN7000_c0_g2_i3;TRINITY_DN7958_c4_g9_i2;TRINITY_DN7281_c0_g3_i1;TRINITY_DN7281_c0_g1_i1;TRINITY_DN7611_c4_g12_i1;TRINITY_DN8007_c0_g1_i1;TRINITY_DN7352_c4_g4_i1;TRINITY_DN2970_c0_g1_i1;
Other types of O-glycan biosynthesis	TRINITY_DN7916_c1_g1_i18;TRINITY_DN7392_c4_g8_i1;TRINITY_DN7916_c1_g4_i2;TRINITY_DN7853_c1_g3_i1;TRINITY_DN7816_c1_g1_i4;TRINITY_DN7853_c1_g2_i1;TRINITY_DN7534_c0_g1_i2;
Oxidative phosphorylation	TRINITY_DN7225_c0_g1_i1;TRINITY_DN7709_c0_g4_i6;TRINITY_DN7780_c1_g2_i3;TRINITY_DN7922_c2_g3_i1;TRINITY_DN8020_c1_g10_i2;TRINITY_DN7479_c7_g2_i2;TRINITY_DN7709_c0_g2_i1;TRINITY_DN7220_c0_g2_i3;TRINITY_DN7758_c6_g1_i1;TRINITY_DN8033_c1_g2_i1;TRINITY_DN7741_c6_g6_i2;TRINITY_DN5871_c0_g1_i4;TRINITY_DN7636_c1_g6_i1;TRINITY_DN5997_c0_g1_i3;TRINITY_DN6672_c0_g1_i2;TRINITY_DN7599_c3_g5_i1;TRINITY_DN7991…
Pantothenate and CoA biosynthesis	TRINITY_DN7801_c0_g1_i4;TRINITY_DN8034_c2_g7_i1;TRINITY_DN7556_c4_g2_i4;TRINITY_DN7835_c1_g2_i1;TRINITY_DN8034_c2_g6_i2;TRINITY_DN7835_c1_g1_i3;TRINITY_DN7556_c4_g1_i2;TRINITY_DN7691_c0_g1_i1;TRINITY_DN7691_c0_g3_i1;TRINITY_DN3647_c0_g1_i1;TRINITY_DN5737_c0_g1_i1;TRINITY_DN6568_c0_g1_i4;TRINITY_DN7554_c2_g11_i1;TRINITY_DN7659_c1_g1_i1;TRINITY_DN7999_c3_g5_i1;TRINITY_DN14457_c0_g1_i1;TRINITY_DN756…
Penicillin and cephalosporin biosynthesis	TRINITY_DN3847_c0_g1_i1;TRINITY_DN3907_c0_g1_i1;
Pentose and glucuronate interconversions	TRINITY_DN7957_c4_g2_i1;TRINITY_DN7375_c0_g1_i1;TRINITY_DN7957_c4_g1_i12;TRINITY_DN7285_c3_g2_i1;TRINITY_DN7375_c0_g3_i1;TRINITY_DN16_c0_g1_i2;TRINITY_DN7922_c1_g1_i4;TRINITY_DN7980_c1_g4_i1;TRINITY_DN7521_c3_g3_i2;TRINITY_DN7282_c8_g2_i1;TRINITY_DN7922_c1_g2_i2;TRINITY_DN7684_c0_g1_i2;TRINITY_DN7605_c4_g5_i1;TRINITY_DN8007_c0_g3_i1;TRINITY_DN7941_c1_g17_i2;TRINITY_DN7966_c5_g1_i3;TRINITY_DN6125_…
Pentose phosphate pathway	TRINITY_DN8107_c2_g2_i12;TRINITY_DN7257_c5_g7_i2;TRINITY_DN7387_c1_g5_i2;TRINITY_DN7812_c3_g6_i1;TRINITY_DN7570_c1_g1_i4;TRINITY_DN8050_c2_g6_i1;TRINITY_DN7484_c7_g7_i1;TRINITY_DN7714_c1_g3_i1;TRINITY_DN7454_c5_g6_i1;TRINITY_DN7257_c5_g9_i1;TRINITY_DN7751_c1_g2_i1;TRINITY_DN8015_c2_g1_i2;TRINITY_DN7802_c0_g1_i2;TRINITY_DN6861_c0_g2_i1;TRINITY_DN6861_c0_g1_i1;TRINITY_DN8015_c2_g10_i1;TRINITY_DN767…
Peroxisome	TRINITY_DN7985_c2_g2_i10;TRINITY_DN8027_c7_g2_i3;TRINITY_DN7701_c1_g3_i3;TRINITY_DN7768_c0_g3_i14;TRINITY_DN7820_c0_g2_i9;TRINITY_DN7701_c1_g2_i1;TRINITY_DN7905_c4_g1_i2;TRINITY_DN7748_c0_g3_i1;TRINITY_DN7827_c3_g1_i1;TRINITY_DN7748_c0_g2_i1;TRINITY_DN7073_c0_g2_i1;TRINITY_DN7787_c6_g3_i1;TRINITY_DN7602_c2_g1_i1;TRINITY_DN7831_c0_g8_i1;TRINITY_DN7675_c3_g6_i2;TRINITY_DN7768_c0_g9_i2;TRINITY_DN754…
Phagosome	TRINITY_DN7511_c2_g2_i5;TRINITY_DN7675_c2_g1_i1;TRINITY_DN7225_c0_g1_i1;TRINITY_DN7942_c1_g2_i1;TRINITY_DN7942_c1_g1_i2;TRINITY_DN8020_c1_g10_i2;TRINITY_DN8011_c0_g1_i1;TRINITY_DN8033_c1_g2_i1;TRINITY_DN7741_c6_g6_i2;TRINITY_DN5871_c0_g1_i4;TRINITY_DN6362_c0_g2_i1;TRINITY_DN7511_c2_g5_i2;TRINITY_DN7994_c3_g1_i1;TRINITY_DN7814_c1_g1_i3;TRINITY_DN7599_c3_g5_i1;TRINITY_DN7709_c0_g5_i3;TRINITY_DN6362…
Phenylalanine metabolism	TRINITY_DN7146_c0_g3_i2;TRINITY_DN7362_c0_g8_i1;TRINITY_DN7052_c0_g1_i6;TRINITY_DN7532_c0_g3_i2;TRINITY_DN7532_c0_g5_i2;TRINITY_DN6144_c0_g1_i4;TRINITY_DN7362_c0_g1_i3;TRINITY_DN7574_c4_g1_i4;TRINITY_DN7146_c0_g4_i1;TRINITY_DN7626_c2_g1_i1;TRINITY_DN6025_c0_g1_i4;TRINITY_DN5960_c0_g1_i2;TRINITY_DN241_c0_g1_i1;TRINITY_DN7547_c0_g1_i3;TRINITY_DN241_c0_g2_i1;TRINITY_DN975_c0_g1_i1;TRINITY_DN5096_c0_…
Phenylalanine, tyrosine and tryptophan biosynthesis	TRINITY_DN7052_c0_g1_i6;TRINITY_DN5604_c0_g2_i1;TRINITY_DN7532_c0_g3_i2;TRINITY_DN7342_c0_g2_i3;TRINITY_DN7450_c4_g2_i5;TRINITY_DN7532_c0_g5_i2;TRINITY_DN7588_c2_g2_i3;TRINITY_DN7342_c0_g1_i2;TRINITY_DN8057_c0_g1_i1;TRINITY_DN5013_c0_g1_i2;TRINITY_DN7835_c0_g4_i1;TRINITY_DN8023_c1_g2_i5;TRINITY_DN7450_c4_g4_i3;TRINITY_DN8071_c2_g3_i1;TRINITY_DN7588_c2_g7_i1;TRINITY_DN7547_c0_g1_i3;TRINITY_DN8057_…
Phenylpropanoid biosynthesis	TRINITY_DN7146_c0_g3_i2;TRINITY_DN4431_c0_g1_i1;TRINITY_DN7124_c0_g1_i4;TRINITY_DN7395_c2_g3_i5;TRINITY_DN7395_c2_g6_i1;TRINITY_DN7395_c1_g4_i1;TRINITY_DN7574_c4_g1_i4;TRINITY_DN4174_c0_g1_i1;TRINITY_DN7765_c0_g5_i1;TRINITY_DN4355_c0_g1_i2;TRINITY_DN7146_c0_g4_i1;TRINITY_DN7765_c0_g4_i1;TRINITY_DN7377_c0_g1_i1;TRINITY_DN7377_c0_g2_i1;
Phosphatidylinositol signaling system	TRINITY_DN7552_c0_g1_i8;TRINITY_DN7407_c1_g1_i2;TRINITY_DN7754_c6_g3_i3;TRINITY_DN7754_c6_g9_i1;TRINITY_DN7675_c2_g1_i1;TRINITY_DN6853_c0_g1_i1;TRINITY_DN7640_c5_g3_i1;TRINITY_DN7569_c1_g6_i1;TRINITY_DN7407_c1_g6_i3;TRINITY_DN7968_c4_g3_i7;TRINITY_DN7385_c1_g2_i1;TRINITY_DN7747_c3_g7_i1;TRINITY_DN7385_c1_g1_i2;TRINITY_DN6853_c0_g2_i1;TRINITY_DN7908_c5_g2_i3;TRINITY_DN7640_c5_g2_i1;TRINITY_DN6362_…
Phospholipase D signaling pathway	TRINITY_DN7407_c1_g1_i2;TRINITY_DN7304_c7_g5_i1;TRINITY_DN7304_c7_g6_i1;TRINITY_DN7961_c3_g1_i9;TRINITY_DN7707_c2_g4_i1;TRINITY_DN7569_c1_g6_i1;TRINITY_DN6951_c0_g2_i1;TRINITY_DN7407_c1_g6_i3;TRINITY_DN7424_c4_g4_i1;TRINITY_DN6951_c0_g1_i1;TRINITY_DN8026_c1_g1_i4;TRINITY_DN7424_c4_g2_i1;TRINITY_DN8026_c2_g7_i1;TRINITY_DN7571_c6_g1_i4;TRINITY_DN7976_c2_g1_i2;TRINITY_DN7727_c0_g7_i3;TRINITY_DN7833_…
Phosphonate and phosphinate metabolism	TRINITY_DN7698_c2_g1_i2;TRINITY_DN7698_c2_g3_i1;TRINITY_DN7698_c2_g2_i6;TRINITY_DN7348_c4_g2_i1;TRINITY_DN6982_c0_g1_i1;TRINITY_DN7698_c2_g4_i3;TRINITY_DN6982_c0_g2_i1;
Plant-pathogen interaction	TRINITY_DN57283_c1_g1_i4;TRINITY_DN57283_c1_g5_i1;TRINITY_DN55531_c0_g2_i1;
Polycyclic aromatic hydrocarbon degradation	TRINITY_DN6988_c0_g1_i1;TRINITY_DN7837_c0_g4_i1;TRINITY_DN7837_c0_g3_i2;TRINITY_DN2263_c0_g1_i1;TRINITY_DN3604_c0_g1_i3;
Polyketide sugar unit biosynthesis	TRINITY_DN6607_c0_g3_i3;TRINITY_DN6607_c0_g1_i3;
Primary bile acid biosynthesis	TRINITY_DN7211_c3_g14_i2;TRINITY_DN7211_c3_g13_i1;TRINITY_DN10093_c0_g1_i1;
Propanoate metabolism	TRINITY_DN7534_c3_g7_i1;TRINITY_DN7590_c3_g2_i3;TRINITY_DN6839_c0_g1_i9;TRINITY_DN7809_c3_g2_i7;TRINITY_DN7900_c6_g7_i1;TRINITY_DN7640_c6_g3_i4;TRINITY_DN8039_c5_g1_i1;TRINITY_DN7327_c1_g14_i1;TRINITY_DN7809_c3_g4_i1;TRINITY_DN7590_c3_g1_i2;TRINITY_DN7318_c1_g2_i2;TRINITY_DN7957_c3_g1_i6;TRINITY_DN8054_c1_g2_i6;TRINITY_DN8039_c5_g2_i3;TRINITY_DN7815_c0_g1_i1;TRINITY_DN7815_c0_g2_i2;TRINITY_DN7900…
Proteasome	TRINITY_DN6614_c0_g1_i1;TRINITY_DN7848_c0_g7_i1;TRINITY_DN7879_c1_g3_i2;TRINITY_DN7364_c0_g3_i1;TRINITY_DN7497_c5_g9_i1;TRINITY_DN7364_c0_g4_i1;TRINITY_DN7254_c2_g10_i1;TRINITY_DN7313_c0_g1_i2;TRINITY_DN7999_c2_g10_i1;TRINITY_DN6931_c0_g2_i1;TRINITY_DN7670_c3_g2_i6;TRINITY_DN8102_c1_g1_i1;TRINITY_DN6722_c0_g2_i2;TRINITY_DN5251_c0_g1_i1;TRINITY_DN5934_c0_g1_i1;TRINITY_DN7670_c3_g1_i2;TRINITY_DN725…
Protein digestion and absorption	TRINITY_DN7545_c0_g1_i2;TRINITY_DN7650_c3_g1_i1;TRINITY_DN7545_c3_g2_i1;TRINITY_DN7650_c3_g2_i1;TRINITY_DN7500_c2_g3_i1;
Protein export	TRINITY_DN7475_c1_g7_i1;TRINITY_DN7264_c0_g3_i1;TRINITY_DN7264_c0_g5_i1;TRINITY_DN7475_c1_g1_i1;TRINITY_DN7444_c4_g1_i2;TRINITY_DN7324_c0_g2_i1;TRINITY_DN7324_c0_g1_i2;TRINITY_DN7848_c0_g10_i2;TRINITY_DN7734_c8_g1_i1;TRINITY_DN11061_c0_g1_i1;TRINITY_DN6065_c0_g1_i1;TRINITY_DN7848_c0_g5_i1;TRINITY_DN6065_c0_g2_i1;TRINITY_DN7753_c3_g1_i2;TRINITY_DN7584_c3_g1_i2;TRINITY_DN7397_c5_g1_i1;TRINITY_DN800…
Protein processing in endoplasmic reticulum	TRINITY_DN7360_c0_g2_i2;TRINITY_DN7360_c0_g1_i1;TRINITY_DN6520_c0_g2_i1;TRINITY_DN7665_c6_g3_i4;TRINITY_DN6882_c0_g3_i1;TRINITY_DN7665_c6_g5_i6;TRINITY_DN8040_c1_g1_i2;TRINITY_DN7718_c2_g4_i2;TRINITY_DN8018_c2_g2_i2;TRINITY_DN7658_c6_g5_i2;TRINITY_DN8018_c2_g5_i2;TRINITY_DN7401_c7_g2_i2;TRINITY_DN7737_c6_g2_i2;TRINITY_DN7912_c2_g1_i1;TRINITY_DN8015_c1_g3_i1;TRINITY_DN7475_c1_g7_i1;TRINITY_DN7378_…
Purine metabolism	TRINITY_DN8107_c2_g2_i12;TRINITY_DN7575_c0_g1_i18;TRINITY_DN7407_c2_g4_i2;TRINITY_DN7701_c1_g3_i3;TRINITY_DN7432_c4_g2_i2;TRINITY_DN7506_c2_g1_i3;TRINITY_DN7575_c0_g2_i1;TRINITY_DN7845_c2_g11_i1;TRINITY_DN7432_c4_g4_i1;TRINITY_DN7845_c2_g1_i1;TRINITY_DN7986_c1_g2_i2;TRINITY_DN7857_c1_g6_i1;TRINITY_DN7701_c1_g2_i1;TRINITY_DN7506_c8_g2_i1;TRINITY_DN7170_c0_g1_i1;TRINITY_DN8099_c4_g3_i6;TRINITY_DN76…
Pyrimidine metabolism	TRINITY_DN7914_c0_g17_i1;TRINITY_DN7963_c4_g1_i1;TRINITY_DN7303_c4_g7_i3;TRINITY_DN7963_c4_g2_i1;TRINITY_DN7837_c0_g6_i2;TRINITY_DN7922_c3_g2_i2;TRINITY_DN7580_c0_g2_i1;TRINITY_DN6919_c1_g1_i1;TRINITY_DN8077_c1_g2_i1;TRINITY_DN7303_c4_g2_i1;TRINITY_DN7837_c0_g5_i2;TRINITY_DN7574_c6_g2_i1;TRINITY_DN7574_c6_g1_i2;TRINITY_DN7448_c0_g1_i1;TRINITY_DN7997_c2_g1_i2;TRINITY_DN6146_c0_g1_i2;TRINITY_DN7922…
Pyruvate metabolism	TRINITY_DN7885_c3_g4_i3;TRINITY_DN7534_c3_g7_i1;TRINITY_DN7520_c1_g7_i2;TRINITY_DN7640_c6_g3_i4;TRINITY_DN7601_c0_g2_i5;TRINITY_DN7644_c0_g9_i4;TRINITY_DN7888_c1_g3_i2;TRINITY_DN7257_c5_g8_i3;TRINITY_DN7957_c3_g1_i6;TRINITY_DN7863_c1_g3_i7;TRINITY_DN7994_c6_g1_i3;TRINITY_DN7548_c0_g1_i3;TRINITY_DN7815_c0_g1_i1;TRINITY_DN7548_c0_g2_i2;TRINITY_DN8019_c2_g1_i1;TRINITY_DN16076_c0_g1_i1;TRINITY_DN7130…
Rap1 signaling pathway	TRINITY_DN7569_c1_g6_i1;TRINITY_DN7571_c6_g1_i4;TRINITY_DN7976_c2_g1_i2;TRINITY_DN7833_c3_g1_i3;TRINITY_DN7948_c7_g1_i2;TRINITY_DN7976_c3_g3_i1;TRINITY_DN7736_c1_g6_i3;TRINITY_DN7569_c1_g10_i1;TRINITY_DN7948_c7_g4_i7;TRINITY_DN7736_c1_g1_i1;TRINITY_DN7833_c3_g2_i3;TRINITY_DN7571_c6_g2_i2;TRINITY_DN7976_c2_g2_i2;TRINITY_DN7976_c3_g2_i4;TRINITY_DN7953_c2_g3_i2;TRINITY_DN7816_c3_g2_i1;TRINITY_DN7569…
Ras signaling pathway	TRINITY_DN7927_c3_g4_i1;TRINITY_DN7927_c3_g8_i9;TRINITY_DN7961_c3_g1_i9;TRINITY_DN7707_c2_g4_i1;TRINITY_DN7955_c0_g1_i4;TRINITY_DN7569_c1_g6_i1;TRINITY_DN6951_c0_g2_i1;TRINITY_DN7424_c4_g4_i1;TRINITY_DN6951_c0_g1_i1;TRINITY_DN8026_c1_g1_i4;TRINITY_DN7424_c4_g2_i1;TRINITY_DN7514_c2_g2_i4;TRINITY_DN7432_c5_g1_i1;TRINITY_DN8026_c2_g7_i1;TRINITY_DN7955_c0_g2_i1;TRINITY_DN7571_c6_g1_i4;TRINITY_DN7927_…
Regulation of actin cytoskeleton	TRINITY_DN7407_c1_g1_i2;TRINITY_DN7675_c2_g1_i1;TRINITY_DN7584_c3_g4_i1;TRINITY_DN6951_c0_g2_i1;TRINITY_DN7407_c1_g6_i3;TRINITY_DN6951_c0_g1_i1;TRINITY_DN8050_c2_g5_i2;TRINITY_DN7571_c6_g1_i4;TRINITY_DN7976_c2_g1_i2;TRINITY_DN8050_c2_g8_i1;TRINITY_DN7833_c3_g1_i3;TRINITY_DN7948_c7_g1_i2;TRINITY_DN7976_c3_g3_i1;TRINITY_DN7948_c7_g4_i7;TRINITY_DN7460_c2_g1_i1;TRINITY_DN7833_c3_g2_i3;TRINITY_DN7722_…
Retinol metabolism	TRINITY_DN7262_c3_g1_i1;TRINITY_DN7696_c4_g2_i4;TRINITY_DN7262_c3_g4_i3;
Riboflavin metabolism	TRINITY_DN7900_c6_g8_i1;TRINITY_DN7717_c5_g2_i3;TRINITY_DN7909_c1_g1_i2;TRINITY_DN6389_c0_g1_i2;TRINITY_DN7900_c6_g3_i1;TRINITY_DN7936_c0_g1_i2;TRINITY_DN3034_c0_g1_i1;TRINITY_DN7831_c0_g9_i1;TRINITY_DN7585_c1_g6_i2;
Ribosome	TRINITY_DN7882_c0_g3_i1;TRINITY_DN7851_c0_g5_i1;TRINITY_DN7134_c0_g1_i1;TRINITY_DN7632_c1_g1_i1;TRINITY_DN7936_c0_g5_i1;TRINITY_DN7632_c1_g2_i1;TRINITY_DN7996_c3_g1_i2;TRINITY_DN7509_c0_g1_i5;TRINITY_DN7572_c3_g2_i4;TRINITY_DN7849_c4_g7_i1;TRINITY_DN7509_c0_g2_i4;TRINITY_DN7327_c1_g3_i7;TRINITY_DN7178_c0_g3_i1;TRINITY_DN7351_c2_g5_i1;TRINITY_DN7485_c0_g5_i1;TRINITY_DN8071_c2_g2_i5;TRINITY_DN7559_…
Ribosome biogenesis in eukaryotes	TRINITY_DN7882_c0_g3_i1;TRINITY_DN7851_c0_g5_i1;TRINITY_DN7632_c1_g1_i1;TRINITY_DN7936_c0_g5_i1;TRINITY_DN7632_c1_g2_i1;TRINITY_DN7996_c3_g1_i2;TRINITY_DN7509_c0_g1_i5;TRINITY_DN7572_c3_g2_i4;TRINITY_DN7849_c4_g7_i1;TRINITY_DN7509_c0_g2_i4;TRINITY_DN7327_c1_g3_i7;TRINITY_DN7178_c0_g3_i1;TRINITY_DN7351_c2_g5_i1;TRINITY_DN7485_c0_g5_i1;TRINITY_DN8071_c2_g2_i5;TRINITY_DN7559_c3_g1_i1;TRINITY_DN7485_…
RNA degradation	TRINITY_DN7860_c0_g2_i1;TRINITY_DN7510_c2_g8_i6;TRINITY_DN7860_c0_g3_i1;TRINITY_DN7849_c4_g7_i1;TRINITY_DN7344_c0_g2_i4;TRINITY_DN7643_c0_g4_i5;TRINITY_DN7908_c6_g3_i2;TRINITY_DN6766_c0_g1_i3;TRINITY_DN7344_c0_g3_i2;TRINITY_DN7414_c3_g2_i1;TRINITY_DN6908_c0_g1_i1;TRINITY_DN6766_c0_g2_i2;TRINITY_DN7041_c1_g2_i2;TRINITY_DN7909_c0_g1_i1;TRINITY_DN8031_c1_g8_i1;TRINITY_DN7228_c3_g1_i1;TRINITY_DN7287_…
RNA polymerase	TRINITY_DN7349_c1_g1_i2;TRINITY_DN7884_c2_g2_i1;TRINITY_DN7304_c7_g1_i2;TRINITY_DN7349_c1_g3_i1;TRINITY_DN7727_c0_g4_i2;TRINITY_DN7727_c0_g8_i1;TRINITY_DN7304_c7_g3_i1;TRINITY_DN7891_c1_g1_i4;TRINITY_DN7933_c1_g1_i2;TRINITY_DN7891_c1_g3_i2;TRINITY_DN7933_c1_g2_i3;TRINITY_DN6249_c0_g1_i1;TRINITY_DN6249_c0_g2_i1;TRINITY_DN6815_c0_g1_i1;TRINITY_DN6975_c0_g1_i3;TRINITY_DN7378_c4_g4_i5;TRINITY_DN7969_…
RNA transport	TRINITY_DN7778_c3_g8_i4;TRINITY_DN7581_c5_g1_i15;TRINITY_DN7882_c0_g3_i1;TRINITY_DN6589_c0_g2_i2;TRINITY_DN8105_c2_g2_i4;TRINITY_DN7382_c2_g2_i1;TRINITY_DN7886_c1_g11_i1;TRINITY_DN6190_c0_g2_i3;TRINITY_DN7128_c0_g1_i2;TRINITY_DN7751_c2_g11_i1;TRINITY_DN7548_c1_g2_i3;TRINITY_DN7652_c4_g4_i2;TRINITY_DN7764_c0_g1_i3;TRINITY_DN7726_c2_g2_i1;TRINITY_DN7782_c3_g1_i11;TRINITY_DN7491_c1_g5_i1;TRINITY_DN6…
Selenocompound metabolism	TRINITY_DN7891_c1_g2_i1;TRINITY_DN7795_c0_g1_i2;TRINITY_DN7636_c1_g2_i1;TRINITY_DN7569_c1_g1_i4;TRINITY_DN6232_c0_g2_i2;TRINITY_DN7221_c0_g1_i4;TRINITY_DN7221_c0_g2_i4;TRINITY_DN7636_c1_g4_i1;TRINITY_DN7803_c1_g2_i1;TRINITY_DN7891_c1_g8_i1;TRINITY_DN7795_c0_g6_i1;TRINITY_DN7233_c0_g1_i2;TRINITY_DN6751_c0_g3_i2;TRINITY_DN7569_c1_g2_i2;TRINITY_DN6751_c0_g2_i1;TRINITY_DN2639_c0_g1_i2;
Sesquiterpenoid and triterpenoid biosynthesis	TRINITY_DN7592_c0_g1_i1;TRINITY_DN7592_c0_g2_i1;
SNARE interactions in vesicular transport	TRINITY_DN6527_c0_g1_i3;TRINITY_DN5317_c0_g1_i1;TRINITY_DN7709_c0_g5_i3;TRINITY_DN7586_c1_g5_i2;TRINITY_DN6507_c0_g2_i1;TRINITY_DN7605_c3_g5_i1;TRINITY_DN6878_c0_g5_i2;TRINITY_DN6507_c0_g1_i1;TRINITY_DN7586_c1_g4_i1;TRINITY_DN6878_c0_g3_i1;TRINITY_DN5861_c0_g2_i1;TRINITY_DN5861_c0_g1_i1;TRINITY_DN7951_c2_g8_i1;TRINITY_DN7939_c1_g3_i2;
Sphingolipid metabolism	TRINITY_DN8073_c1_g4_i2;TRINITY_DN7403_c0_g4_i1;TRINITY_DN7359_c4_g3_i2;TRINITY_DN7403_c0_g5_i3;TRINITY_DN6564_c0_g1_i2;TRINITY_DN7781_c2_g2_i1;TRINITY_DN7534_c1_g3_i1;TRINITY_DN6414_c0_g1_i2;TRINITY_DN7672_c3_g2_i1;TRINITY_DN6414_c0_g2_i2;TRINITY_DN6564_c0_g2_i1;TRINITY_DN7727_c0_g7_i3;TRINITY_DN6259_c0_g1_i1;TRINITY_DN7656_c6_g8_i2;TRINITY_DN8007_c0_g1_i1;TRINITY_DN7656_c6_g5_i2;TRINITY_DN7499_…
Sphingolipid signaling pathway	TRINITY_DN8073_c1_g4_i2;TRINITY_DN7961_c3_g1_i9;TRINITY_DN7707_c2_g4_i1;TRINITY_DN7359_c4_g3_i2;TRINITY_DN7569_c1_g6_i1;TRINITY_DN6564_c0_g1_i2;TRINITY_DN8026_c1_g1_i4;TRINITY_DN7972_c3_g2_i5;TRINITY_DN7534_c1_g3_i1;TRINITY_DN8026_c2_g7_i1;TRINITY_DN7343_c3_g6_i1;TRINITY_DN7972_c3_g1_i1;TRINITY_DN7571_c6_g1_i4;TRINITY_DN7672_c3_g2_i1;TRINITY_DN7976_c2_g1_i2;TRINITY_DN6564_c0_g2_i1;TRINITY_DN2126_…
Spliceosome	TRINITY_DN7820_c0_g1_i25;TRINITY_DN8105_c2_g2_i4;TRINITY_DN8092_c0_g1_i6;TRINITY_DN7417_c2_g4_i1;TRINITY_DN7886_c1_g11_i1;TRINITY_DN7672_c4_g4_i4;TRINITY_DN7732_c5_g2_i7;TRINITY_DN7935_c4_g2_i9;TRINITY_DN7723_c3_g9_i1;TRINITY_DN7860_c0_g1_i1;TRINITY_DN7394_c0_g6_i2;TRINITY_DN7782_c3_g1_i11;TRINITY_DN7579_c3_g2_i3;TRINITY_DN7414_c4_g10_i1;TRINITY_DN7658_c3_g1_i1;TRINITY_DN7312_c0_g3_i2;TRINITY_DN7…
Starch and sucrose metabolism	TRINITY_DN8107_c2_g2_i12;TRINITY_DN8073_c1_g7_i1;TRINITY_DN7530_c0_g2_i11;TRINITY_DN8073_c1_g2_i1;TRINITY_DN8031_c1_g6_i5;TRINITY_DN7321_c4_g3_i2;TRINITY_DN7862_c1_g8_i2;TRINITY_DN7876_c2_g2_i2;TRINITY_DN6630_c0_g1_i5;TRINITY_DN7876_c2_g5_i1;TRINITY_DN8031_c1_g1_i4;TRINITY_DN7862_c1_g1_i1;TRINITY_DN4431_c0_g1_i1;TRINITY_DN7581_c5_g2_i3;TRINITY_DN6556_c0_g2_i2;TRINITY_DN7157_c0_g2_i2;TRINITY_DN768…
Steroid biosynthesis	TRINITY_DN7983_c1_g3_i5;TRINITY_DN7601_c0_g1_i3;TRINITY_DN7913_c6_g5_i2;TRINITY_DN7601_c0_g4_i2;TRINITY_DN7971_c0_g1_i1;TRINITY_DN7592_c0_g1_i1;TRINITY_DN7983_c1_g2_i4;TRINITY_DN7472_c4_g2_i2;TRINITY_DN4083_c0_g1_i4;TRINITY_DN16091_c0_g1_i1;TRINITY_DN7531_c0_g4_i1;TRINITY_DN7881_c1_g1_i1;TRINITY_DN7944_c1_g5_i5;TRINITY_DN7944_c1_g6_i1;TRINITY_DN7472_c4_g4_i2;TRINITY_DN7913_c6_g2_i1;TRINITY_DN7641…
Steroid hormone biosynthesis	TRINITY_DN7724_c1_g3_i2;TRINITY_DN7075_c0_g1_i1;TRINITY_DN6695_c0_g1_i1;TRINITY_DN6695_c0_g2_i1;TRINITY_DN7075_c0_g2_i1;
Styrene degradation	TRINITY_DN6984_c0_g3_i2;TRINITY_DN6144_c0_g1_i4;TRINITY_DN7310_c0_g2_i2;TRINITY_DN6984_c0_g2_i2;TRINITY_DN5960_c0_g1_i2;
Sulfur metabolism	TRINITY_DN7016_c0_g3_i1;TRINITY_DN7965_c0_g4_i1;TRINITY_DN7016_c0_g1_i3;TRINITY_DN8105_c2_g3_i1;TRINITY_DN7965_c0_g1_i1;TRINITY_DN8105_c2_g5_i4;TRINITY_DN7221_c0_g1_i4;TRINITY_DN7221_c0_g2_i4;TRINITY_DN6189_c0_g1_i2;TRINITY_DN7446_c4_g8_i1;TRINITY_DN6189_c0_g2_i1;TRINITY_DN7803_c1_g2_i1;TRINITY_DN7495_c0_g2_i1;TRINITY_DN7282_c5_g1_i1;TRINITY_DN4565_c0_g1_i2;TRINITY_DN7233_c0_g1_i2;TRINITY_DN3000_…
Sulfur relay system	TRINITY_DN7940_c0_g2_i7;TRINITY_DN8070_c1_g1_i1;TRINITY_DN7961_c0_g1_i2;TRINITY_DN8070_c1_g2_i1;TRINITY_DN6405_c0_g1_i1;TRINITY_DN7786_c0_g4_i2;TRINITY_DN16266_c0_g1_i1;TRINITY_DN4565_c0_g1_i2;TRINITY_DN5313_c0_g1_i1;TRINITY_DN7786_c0_g2_i1;TRINITY_DN6518_c0_g2_i3;TRINITY_DN594_c0_g1_i1;TRINITY_DN770_c0_g1_i1;
Synthesis and degradation of ketone bodies	TRINITY_DN7861_c0_g3_i1;TRINITY_DN7540_c0_g2_i2;TRINITY_DN7815_c0_g1_i1;TRINITY_DN7815_c0_g2_i2;TRINITY_DN7796_c1_g7_i2;TRINITY_DN7861_c0_g5_i2;
Taurine and hypotaurine metabolism	TRINITY_DN8023_c1_g1_i11;TRINITY_DN7729_c0_g11_i2;TRINITY_DN8023_c1_g5_i2;TRINITY_DN7620_c2_g1_i2;TRINITY_DN7957_c3_g1_i6;TRINITY_DN7551_c2_g4_i5;TRINITY_DN6763_c0_g2_i2;TRINITY_DN7551_c2_g5_i3;TRINITY_DN7573_c2_g7_i3;TRINITY_DN6449_c0_g2_i1;TRINITY_DN7729_c0_g14_i1;TRINITY_DN6763_c0_g1_i4;TRINITY_DN7573_c2_g1_i1;TRINITY_DN6415_c0_g1_i3;
Terpenoid backbone biosynthesis	TRINITY_DN7720_c1_g1_i2;TRINITY_DN7379_c6_g6_i2;TRINITY_DN7619_c3_g4_i1;TRINITY_DN6905_c0_g2_i1;TRINITY_DN6905_c0_g1_i1;TRINITY_DN7675_c3_g6_i2;TRINITY_DN7822_c2_g1_i4;TRINITY_DN7815_c0_g1_i1;TRINITY_DN8091_c4_g4_i1;TRINITY_DN7815_c0_g2_i2;TRINITY_DN7778_c3_g10_i1;TRINITY_DN7466_c4_g1_i1;TRINITY_DN7796_c1_g7_i2;TRINITY_DN7675_c3_g11_i1;TRINITY_DN4981_c0_g1_i1;TRINITY_DN7466_c6_g9_i2;TRINITY_DN602…
Thermogenesis	TRINITY_DN8081_c5_g1_i15;TRINITY_DN7304_c7_g5_i1;TRINITY_DN7304_c7_g6_i1;TRINITY_DN7861_c0_g2_i1;TRINITY_DN7780_c1_g2_i3;TRINITY_DN7970_c2_g4_i1;TRINITY_DN7970_c2_g1_i2;TRINITY_DN7922_c2_g3_i1;TRINITY_DN7768_c0_g3_i14;TRINITY_DN5281_c0_g1_i1;TRINITY_DN6951_c0_g2_i1;TRINITY_DN7479_c7_g2_i2;TRINITY_DN6951_c0_g1_i1;TRINITY_DN7440_c1_g12_i1;TRINITY_DN7514_c2_g2_i4;TRINITY_DN7432_c5_g1_i1;TRINITY_DN78…
Thiamine metabolism	TRINITY_DN7415_c1_g2_i2;TRINITY_DN7900_c6_g8_i1;TRINITY_DN8070_c1_g1_i1;TRINITY_DN8070_c1_g2_i1;TRINITY_DN7381_c1_g6_i2;TRINITY_DN6389_c0_g1_i2;TRINITY_DN7620_c2_g3_i1;TRINITY_DN7900_c6_g3_i1;TRINITY_DN7415_c1_g3_i1;TRINITY_DN2594_c0_g1_i1;TRINITY_DN7856_c4_g2_i1;TRINITY_DN7936_c0_g1_i2;TRINITY_DN7620_c2_g2_i2;
Toluene degradation	TRINITY_DN6985_c0_g1_i4;TRINITY_DN7798_c1_g1_i1;TRINITY_DN7873_c4_g6_i1;TRINITY_DN7798_c2_g1_i1;TRINITY_DN7873_c4_g8_i1;
Tropane, piperidine and pyridine alkaloid biosynthesis	TRINITY_DN7362_c0_g8_i1;TRINITY_DN7052_c0_g1_i6;TRINITY_DN7532_c0_g3_i2;TRINITY_DN7532_c0_g5_i2;TRINITY_DN7362_c0_g1_i3;TRINITY_DN7626_c2_g1_i1;TRINITY_DN7547_c0_g1_i3;
Tryptophan metabolism	TRINITY_DN7146_c0_g3_i2;TRINITY_DN7052_c0_g1_i6;TRINITY_DN7761_c1_g3_i2;TRINITY_DN6939_c0_g2_i3;TRINITY_DN6939_c0_g1_i1;TRINITY_DN7809_c3_g2_i7;TRINITY_DN7809_c3_g4_i1;TRINITY_DN7257_c5_g8_i3;TRINITY_DN7073_c0_g2_i1;TRINITY_DN7915_c4_g1_i11;TRINITY_DN6144_c0_g1_i4;TRINITY_DN7310_c0_g2_i2;TRINITY_DN7073_c0_g1_i2;TRINITY_DN7450_c1_g2_i3;TRINITY_DN6221_c0_g1_i1;TRINITY_DN7761_c1_g6_i6;TRINITY_DN6994…
Two-component system	TRINITY_DN7119_c0_g1_i2;TRINITY_DN7415_c1_g2_i2;TRINITY_DN7527_c3_g7_i1;TRINITY_DN7561_c5_g5_i1;TRINITY_DN7641_c0_g3_i1;TRINITY_DN7561_c5_g4_i1;TRINITY_DN6758_c0_g1_i2;TRINITY_DN7626_c3_g2_i1;TRINITY_DN4275_c0_g1_i1;TRINITY_DN8101_c4_g1_i4;TRINITY_DN16_c0_g1_i2;TRINITY_DN7271_c2_g12_i1;TRINITY_DN7361_c3_g2_i2;TRINITY_DN7707_c2_g3_i1;TRINITY_DN8009_c1_g3_i1;TRINITY_DN5749_c0_g1_i1;TRINITY_DN16245_…
Tyrosine metabolism	TRINITY_DN7362_c0_g8_i1;TRINITY_DN7980_c1_g7_i8;TRINITY_DN7052_c0_g1_i6;TRINITY_DN7532_c0_g3_i2;TRINITY_DN7980_c1_g5_i4;TRINITY_DN6984_c0_g3_i2;TRINITY_DN7696_c4_g2_i4;TRINITY_DN7532_c0_g5_i2;TRINITY_DN7656_c6_g6_i1;TRINITY_DN2454_c0_g1_i1;TRINITY_DN6112_c0_g1_i10;TRINITY_DN7362_c0_g1_i3;TRINITY_DN6984_c0_g2_i2;TRINITY_DN4958_c0_g1_i2;TRINITY_DN6239_c0_g1_i1;TRINITY_DN7626_c2_g1_i1;TRINITY_DN7127…
Ubiquinone and other terpenoid-quinone biosynthesis	TRINITY_DN7052_c0_g1_i6;TRINITY_DN6999_c1_g1_i2;TRINITY_DN7330_c0_g1_i1;TRINITY_DN7853_c1_g4_i1;TRINITY_DN6025_c0_g1_i4;TRINITY_DN975_c0_g1_i1;TRINITY_DN6494_c0_g2_i1;TRINITY_DN12645_c0_g1_i1;
Ubiquitin mediated proteolysis	TRINITY_DN7472_c4_g5_i2;TRINITY_DN7113_c0_g1_i3;TRINITY_DN7588_c3_g2_i3;TRINITY_DN6882_c0_g3_i1;TRINITY_DN7590_c4_g3_i1;TRINITY_DN6753_c0_g1_i2;TRINITY_DN7776_c2_g2_i1;TRINITY_DN8049_c1_g3_i1;TRINITY_DN7472_c4_g6_i1;TRINITY_DN8067_c1_g4_i2;TRINITY_DN7918_c3_g1_i3;TRINITY_DN6435_c0_g1_i2;TRINITY_DN6424_c2_g1_i1;TRINITY_DN6424_c0_g1_i1;TRINITY_DN7974_c0_g2_i1;TRINITY_DN8103_c3_g1_i2;TRINITY_DN1515_…
Valine, leucine and isoleucine biosynthesis	TRINITY_DN7934_c2_g5_i2;TRINITY_DN8034_c2_g7_i1;TRINITY_DN7556_c4_g2_i4;TRINITY_DN7754_c6_g13_i1;TRINITY_DN7835_c1_g2_i1;TRINITY_DN8034_c2_g6_i2;TRINITY_DN7835_c1_g1_i3;TRINITY_DN7556_c4_g1_i2;TRINITY_DN7691_c0_g1_i1;TRINITY_DN7754_c6_g8_i1;TRINITY_DN7691_c0_g3_i1;TRINITY_DN8019_c2_g1_i1;TRINITY_DN8019_c4_g1_i1;TRINITY_DN7554_c2_g11_i1;TRINITY_DN7659_c1_g1_i1;TRINITY_DN7934_c2_g2_i1;TRINITY_DN623…
Valine, leucine and isoleucine degradation	TRINITY_DN8067_c1_g1_i11;TRINITY_DN7809_c3_g2_i7;TRINITY_DN7900_c6_g7_i1;TRINITY_DN7327_c1_g14_i1;TRINITY_DN7556_c4_g2_i4;TRINITY_DN7809_c3_g4_i1;TRINITY_DN7861_c0_g3_i1;TRINITY_DN7257_c5_g8_i3;TRINITY_DN7898_c6_g2_i1;TRINITY_DN7598_c0_g4_i1;TRINITY_DN7540_c0_g2_i2;TRINITY_DN7556_c4_g1_i2;TRINITY_DN7714_c1_g2_i1;TRINITY_DN7815_c0_g1_i1;TRINITY_DN7535_c2_g6_i1;TRINITY_DN7716_c4_g10_i1;TRINITY_DN80…
Various types of N-glycan biosynthesis	TRINITY_DN7991_c0_g1_i6;TRINITY_DN8018_c2_g2_i2;TRINITY_DN7658_c6_g5_i2;TRINITY_DN8018_c2_g5_i2;TRINITY_DN7722_c2_g8_i3;TRINITY_DN7991_c0_g6_i1;TRINITY_DN7281_c0_g3_i1;TRINITY_DN14347_c0_g1_i1;TRINITY_DN7281_c0_g1_i1;TRINITY_DN5833_c0_g1_i1;TRINITY_DN6107_c0_g1_i2;TRINITY_DN5172_c0_g1_i3;TRINITY_DN4262_c0_g1_i2;TRINITY_DN7329_c1_g1_i1;TRINITY_DN3888_c0_g1_i1;TRINITY_DN5202_c0_g1_i1;TRINITY_DN7070…
Vitamin B6 metabolism	TRINITY_DN7900_c5_g3_i1;TRINITY_DN7324_c2_g3_i4;TRINITY_DN4113_c0_g1_i3;TRINITY_DN332_c0_g1_i2;TRINITY_DN56254_c0_g3_i2;
Vitamin digestion and absorption	TRINITY_DN7343_c3_g6_i1;TRINITY_DN8078_c2_g6_i1;TRINITY_DN8078_c2_g3_i2;
Zeatin biosynthesis	TRINITY_DN1272_c0_g1_i1;
